# Supplementary material
Source: PubMed Central journal article supplement (PMC3541778)
Supplement: NIHMS414768-supplement-Supporting_Information.pdf [file NIHMS414768-supplement-Supporting_Information.pdf]

|                                    |            |
|------------------------------------|------------|
| <b>General Method.....</b>         | <b>S2</b>  |
| <b>Experimental Procedure.....</b> | <b>S2</b>  |
| <b>Selected NMR Spectra.....</b>   | <b>S10</b> |
| <b>References.....</b>             | <b>S32</b> |

**General.** Tetrahydrofuran and diethyl ether were dried by filtration through two columns of activated, neutral alumina according to the procedure described by Grubbs.<sup>1</sup> Methanol (MeOH), acetonitrile (MeCN), and dimethylformamide (DMF) were dried by filtration through two columns of activated molecular sieves, and toluene was dried by filtration through one column of activated, neutral alumina followed by one column of Q5 reactant. These solvents were determined to have less than 50 ppm H<sub>2</sub>O by Karl Fischer coulometric moisture analysis. Benzene, methylene chloride (CH<sub>2</sub>Cl<sub>2</sub>), diisopropylamine (*i*-Pr<sub>2</sub>NH), triethylamine (Et<sub>3</sub>N), diisopropylethylamine (*i*-Pr<sub>2</sub>NEt), and pyridine were distilled from calcium hydride immediately prior to use. Zn granules were activated by stirring with 1M HCl for 10 min, filtering, rinsing with D.I. H<sub>2</sub>O, MeOH, then Et<sub>2</sub>O, and drying under vacuum before use. 2-Deoxy-D-ribose was purchased from Carbosynth. All reagents were reagent grade and used without purification unless otherwise noted, and air or moisture sensitive reagents were weighed in a glove box. All reactions involving air or moisture sensitive reagents or intermediates were performed under an inert atmosphere of nitrogen or argon in glassware that was flame or oven dried. Solutions were degassed using three freeze-pump-thaw cycles under vacuum. Reaction temperatures refer to the temperature of the cooling/heating bath. Volatile solvents were removed under reduced pressure using a Büchi rotary evaporator at 25–30 °C (bath temperature). Thin layer chromatography was run on pre-coated plates of silica gel with a 0.25 mm thickness containing 60F-254 indicator (EMD Millipore). Chromatography was performed using forced flow (flash chromatography) and the indicated solvent system on 230-400 mesh silica gel (Silicycle flash F60) according to the method of Still,<sup>2</sup> unless otherwise noted.

Infrared (IR) spectra were obtained either neat on sodium chloride or as solutions in the solvent indicated and reported as wavenumbers (cm<sup>-1</sup>). Proton nuclear magnetic resonance (<sup>1</sup>H NMR) and carbon nuclear magnetic resonance (<sup>13</sup>C NMR) spectra were obtained at the indicated field as solutions in CDCl<sub>3</sub> unless otherwise indicated. Chemical shifts are referenced to the deuterated solvent (*e.g.*, for CDCl<sub>3</sub>, δ = 7.26 ppm and 77.0 ppm for <sup>1</sup>H and <sup>13</sup>C NMR, respectively) and are reported in parts per million (ppm, δ) relative to tetramethylsilane (TMS, δ = 0.00 ppm). Coupling constants (*J*) are reported in Hz and the splitting abbreviations used are: s, singlet; d, doublet; t, triplet; q, quartet; m, multiplet; comp, overlapping multiplets of magnetically nonequivalent protons; br, broad; app, apparent.

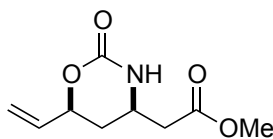

16

**Methyl 2-[(4R,6S)-6-ethenyl-2-oxo-1,3-oxazinan-4-yl]acetate (16).** Compound **14** (20.25 g, 101.5 mmol) was dissolved in dry CH<sub>2</sub>Cl<sub>2</sub> (895 mL) and cooled to -10 °C (bath temperature) in an

ice/brine bath. NaH (4.31 g, 180.1 mmol, 60% w/w dispersion in mineral oil) was added in one portion, and the mixture was stirred under an atmosphere of N<sub>2</sub> (g) at -10 °C for 1.5 h. The reaction was quenched by the slow addition of saturated aqueous NH<sub>4</sub>Cl (650 mL), and the aqueous layer was extracted with CH<sub>2</sub>Cl<sub>2</sub> (4 x 300 mL). The combined organic layers were dried (MgSO<sub>4</sub>), filtered, and concentrated under reduced pressure. The crude residue was purified by recrystallization from methyl *tert*-butylether to give 17.09 g (85%) of **16** as a crystalline mixture (*dr* = 8:1) of diastereomers:  $[\alpha]_D^{25}$  -19 (c = 1.0, CHCl<sub>3</sub>); <sup>1</sup>H NMR (CDCl<sub>3</sub>, 400 MHz, major diastereomer) δ 6.48 (br s, 1 H), 5.92-5.83 (m, 1 H), 5.41 (d, *J* = 17.2 Hz, 1 H), 5.27 (d, *J* = 10.8 Hz, 1 H), 4.75 (q, *J* = 5.6 Hz, 1 H), 3.98-3.91 (m, 1 H), 3.72 (s, 3 H), 2.57 (dd, *J* = 4.4, 3.2 Hz, 2 H), 1.60-1.51 (m, 2 H); <sup>13</sup>C NMR (CDCl<sub>3</sub>, 100 MHz) δ 170.8, 153.8, 134.7, 117.4, 76.6, 51.9, 47.0, 39.9, 33.1; IR (neat) 3428, 2951, 1722, 1660, 1436 cm<sup>-1</sup>; HRMS (CI) *m/z* 200.0924 [C<sub>9</sub>H<sub>14</sub>NO<sub>4</sub> (M+H) requires 200.0923].

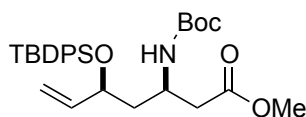

**18**

**Methyl (3R, 5S)-3-[(*tert*-butoxy)carbonyl]amino)-5-[(*tert*-butyldiphenylsilyl)oxy]hept-6-enoate (**18**).** A solution of **17** (22.22 g, 74.2 mmol) and Cs<sub>2</sub>CO<sub>3</sub> (2.86 g, 14.8 mmol) in MeOH (370 mL) was stirred at room temperature for 24-48 h until starting material was consumed by TLC (SiO<sub>2</sub>, Hex:EtOAc, 1:1). The reaction was then concentrated under reduced pressure to provide 20.28 g of amino alcohol as colorless oil that was taken on without further purification.

A solution of amino alcohol prepared above (20.28 g, 74.2 mmol) in DMF (50 mL) was added to a solution of TBDPSCI (30.59 g, 111.3 mmol), imidazole (6.57 g, 96.46 mmol), and DMAP (0.091 g, 0.742 mmol) in DMF (320 mL), and the reaction was stirred at room temperature overnight. The reaction was quenched with 1 M HCl (300 mL), and the layers were separated. The aqueous layer was extracted with Et<sub>2</sub>O (3 x 150 mL), and the combined organic layers were dried (MgSO<sub>4</sub>), filtered, and concentrated under reduced pressure. The crude residue was purified by flash chromatography eluting with hexanes:EtOAc (5:1) to give 30.38 g (80%) of **18** as a colorless oil:  $[\alpha]_D^{25}$  +7.0 (c = 1.0, CHCl<sub>3</sub>); <sup>1</sup>H NMR (CDCl<sub>3</sub>, 400 MHz, rotamers) δ 7.70-7.63 (comp, 4 H), 7.47-7.33 (comp, 6 H), 5.85 (ddd, *J* = 17.2, 10.2, 6.4 Hz, 1 H), 5.10-5.03 (comp, 2 H), 4.41 (app d, *J* = 8.8 Hz, 1 H), 4.17 (app q, *J* = 6.0 Hz, 1 H), 3.91-3.81 (m, 1 H), 3.60 (s, 3 H), 2.40 (app d, *J* = 4.8 Hz, 2 H), 1.62 (app t, *J* = 6.4 Hz, 2 H), 1.36 (s, 9 H), 1.07 (s, 9 H); <sup>13</sup>C NMR (CDCl<sub>3</sub>, 100 MHz, rotamers) δ 171.8, 154.8, 139.4, 135.90, 135.87, 134.1, 133.7, 129.8, 129.6, 127.6, 127.4, 115.5, 79.0, 72.2, 51.5, 44.2, 42.3, 39.6, 28.3, 27.0, 19.2; IR (neat) 3423, 2959, 2932, 2858, 1737, 1716, 1502, 1170, 1111 cm<sup>-1</sup>; HRMS (ESI) 512.2830 [C<sub>29</sub>H<sub>42</sub>NO<sub>5</sub>Si (M+H) requires 512.2754].

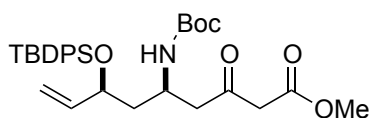

19

**Methyl (5*R*,7*S*)-5-[[*tert*-butoxy]carbonylamino]-7-[[*tert*-butyldiphenylsilyloxy]-3-oxonon-8-enoate (19).** A solution of freshly distilled methyl acetate (4.75 g, 64.10 mmol) in THF (128 mL) was added dropwise via syringe pump to a solution of NaHMDS (83.33 mmol, 1.8 M in hexane) in THF (167 mL) at  $-78\text{ }^{\circ}\text{C}$ . After 30 min, a solution of **18** (3.28 g, 6.41 mmol) in THF (13 mL) was added dropwise to the reaction via syringe pump. During the syringe pump additions the metal needle used to transfer the substrate solutions was passed through a  $-78\text{ }^{\circ}\text{C}$  bath to precool the solutions before introduction into the reaction flask. After 1 h at  $-78\text{ }^{\circ}\text{C}$ , the reaction was warmed to  $-10\text{ }^{\circ}\text{C}$  (ice/brine bath) and stirred for 6 h. The reaction was then quenched by addition of saturated aqueous  $\text{NH}_4\text{Cl}$  (300 mL) and warmed to room temperature. The reaction mixture was extracted with EtOAc (5 x 100 mL), and the combined organic layers were dried ( $\text{Na}_2\text{SO}_4$ ), filtered, and concentrated under reduced pressure. The crude residue was purified by flash chromatography eluting with hexanes:EtOAc (using a gradient from 9:1 to 5:1) to give 3.55 g (75%) of **19** as colorless oil along with 0.56 g (17%) of recovered starting material:  $^1\text{H}$  NMR ( $\text{CDCl}_3$ , 400 MHz, rotamers)  $\delta$  7.69-7.62 (comp, 4 H), 7.47-7.33 (comp, 6 H), 5.83 (ddd,  $J = 17.1, 10.4, 6.4$  Hz, 1 H), 5.10-5.03 (comp, 2 H), 4.37 (app d,  $J = 8.0$  Hz, 1 H), 4.15 (app q,  $J = 4.0$  Hz, 1 H), 3.92-3.83 (m, 1 H), 3.70 (s, 3 H), 3.37 (s, 2 H), 2.61 (app d,  $J = 2.8$  Hz, 2 H), 1.68-1.61 (m, 2 H), 1.35 (s, 9 H), 1.07 (s, 9 H);  $^{13}\text{C}$  NMR ( $\text{CDCl}_3$ , 100 MHz, rotamers)  $\delta$  172.6, 167.6, 154.9, 139.4, 135.9, 135.8, 134.0, 133.6, 129.8, 129.6, 127.6, 127.4, 115.5, 79.0, 72.3, 52.2, 49.0, 47.9, 43.9, 42.1, 28.2, 26.9, 19.1; IR (neat) 3417, 2957, 2932, 2858, 1746, 1715, 1714, 1502, 1246, 1169, 1111  $\text{cm}^{-1}$ ; HRMS (ESI) 576.2750 [ $\text{C}_{31}\text{H}_{43}\text{NO}_6\text{SiNa}$  ( $\text{M}+\text{Na}$ ) requires 576.2757].

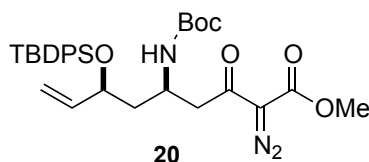

20

**Methyl (5*R*,7*S*)-5-[[*tert*-butoxy]carbonylamino]-7-[[*tert*-butyldiphenylsilyloxy]-2-diazo-3-oxonon-8-enoate (20).** A solution of **19** (3.55 g, 1.97 mmol), *p*-ABSA (0.708 g, 2.95 mmol), and  $\text{NEt}_3$  (0.598 g, 5.91 mmol) in MeCN (6.6 mL) was stirred at room temperature for 16 h. The reaction was concentrated, and the crude residue was triturated with  $\text{Et}_2\text{O}$  (25 mL). The precipitate was removed by filtration, and the solid was rinsed with  $\text{Et}_2\text{O}/\text{CH}_2\text{Cl}_2$  (25 mL, 2:1). The combined filtrate and washings were concentrated under reduced pressure. The crude residue was purified by column chromatography eluting with Hex:EtOAc (2:1) to give 1.14 g (92%) of **20** as a yellow oil:  $^1\text{H}$  NMR ( $\text{CDCl}_3$ , 400 MHz,

rotamers)  $\delta$  7.71-7.63 (comp, 4 H), 7.46-7.33 (comp, 6 H), 5.83 (ddd,  $J = 17.0, 10.2, 6.4$  Hz, 1 H), 5.10-5.03 (comp, 2 H), 4.31 (app d,  $J = 9.6$  Hz, 1 H), 4.21-4.13 (m, 1 H), 3.99-3.92 (m, 1 H), 3.81 (s, 3 H), 2.96-2.83 (comp, 2 H), 1.71-1.56 (comp, 2 H), 1.34 (s, 9 H), 1.06 (s, 9 H);  $^{13}\text{C}$  NMR ( $\text{CDCl}_3$ , 100 MHz, rotamers)  $\delta$  190.6, 161.6, 154.9, 139.4, 135.9, 134.1, 133.7, 129.7, 129.6, 128.2, 127.5, 127.4, 115.4, 78.8, 76.2, 72.2, 52.1, 45.6, 44.5, 42.7, 28.2, 26.9, 19.1; IR (neat) 3417, 2959, 2932, 2856, 2136, 1716, 1655, 1500, 1313, 1171, 1112  $\text{cm}^{-1}$ ; HRMS (ESI) 580.2838 [ $\text{C}_{31}\text{H}_{42}\text{N}_3\text{O}_6\text{Si}$  (M+H) requires 580.2843].

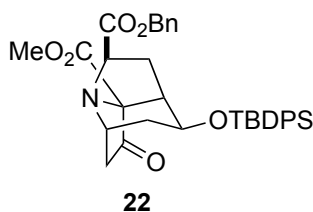

**6-Benzyl-8-methyl-(6R)-3-[(*tert*-butyldiphenylsilyl)oxy]-9-oxo-7-azatricyclo**

**[5.3.0.04<sup>8</sup>]decane-6,8-dicarboxylate (22).** Trifluoroacetic acid (1.58 mL, 20.7 mmol) was added to a precooled solution of **20** (1.20 g, 2.07 mmol) in  $\text{CH}_2\text{Cl}_2$  (10 mL) at 0 °C. The reaction was warmed to room temperature and stirred for 2 h. The reaction was concentrated to dryness and pumped down under high vacuum for 2 h to ensure the removal of all excess TFA. The crude residue was dissolved in  $\text{CH}_2\text{Cl}_2$  (6 mL), 4 Å molecular sieves (1.2 g) were added, and the mixture was cooled to -20 °C.  $\text{NEt}_3$  (0.32 mL, 2.28 mmol) was then added dropwise, and the reaction was warmed to room temperature. A 1 M solution of benzyl glyoxylate (3.11 mL, 3.11 mmol) in  $\text{CH}_2\text{Cl}_2$  was added, and the reaction was stirred for 16 h at room temperature. The reaction was filtered through Celite, and the filter pad was rinsed with  $\text{CH}_2\text{Cl}_2$  (12 mL) to give **21** as colorless oil containing an equimolar amount of  $\text{TFA}\cdot\text{NEt}_3$ . The crude residue was dissolved in xylenes (40 mL),  $\text{Rh}_2(\text{OAc})_4$  (0.027 g, 0.062 mmol) was added, and the mixture was heated under reflux for 24 h. The mixture was concentrated under reduced pressure, and the crude residue was purified by column chromatography eluting with Hex:EtOAc (3:1 to 1:1, with 1% v/v  $\text{NEt}_3$ ) to give 0.93 g (75%) of **22** as a light yellow oil:  $[\alpha]_D^{25} -63$  ( $c = 0.3$ ,  $\text{CHCl}_3$ ).  $^1\text{H}$  NMR ( $\text{CDCl}_3$ , 400 MHz)  $\delta$  7.59-7.55 (comp, 4 H), 7.45-7.35 (comp, 11 H), 5.28 (d,  $J = 3.2$  Hz, 2 H), 4.15 (app q,  $J = 6.0$  Hz, 1 H), 4.08-4.04 (m, 1 H), 3.94-3.89 (m, 1 H), 3.72 (s, 3 H), 2.96 (app q,  $J = 3.2$  Hz, 1 H), 2.68 (dd,  $J = 13.6, 5.6$  Hz, 1 H), 2.61 (dd,  $J = 16.0, 6.4$  Hz, 1 H), 2.15-2.07 (m, 1 H), 1.80 (d,  $J = 17.6$  Hz, 1 H), 1.35-1.19 (comp, 2 H), 1.04 (s, 9 H);  $^{13}\text{C}$  NMR ( $\text{CDCl}_3$ , 100 MHz)  $\delta$  207.0, 172.5, 169.7, 167.4, 135.5, 135.5, 135.3, 134.7, 133.5, 133.0, 130.0, 129.9, 128.6, 128.5, 127.8, 127.6, 82.4, 67.0, 66.2, 62.3, 54.2, 53.1, 49.7, 44.0, 33.6, 27.0, 26.8, 19.0; IR (neat) 2953, 2857, 1738, 1741, 1428, 1228, 1112  $\text{cm}^{-1}$ ; HRMS (ESI)  $m/z$  598.2614 [ $\text{C}_{35}\text{H}_{40}\text{NO}_6\text{Si}$  (M+H) requires 598.2625].

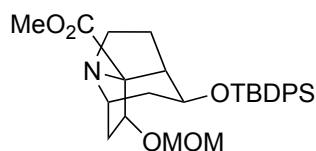

**31**

**Methyl-3-[(*tert*-butyldiphenylsilyl)oxy]-9-methyloxymethyloxy-7-azatricyclo[5.3.0.0<sup>4,8</sup>]-decane-8-carboxylate (**31**).** A suspension of **30** (0.340 g, 0.528 mmol) and 10 % *w/w* Pd/C (84 mg) in EtOH (11 mL) was stirred under an atmosphere of H<sub>2</sub> (gas) at room temperature for 16 h. The mixture was filtered through a short pad of Celite, which was rinsed with EtOH (30 mL), and the combined filtrate and washings were concentrated to dryness to give 0.292 g (100%) of the corresponding acid as an amorphous solid. The acid thus obtained (0.292 g, 0.528 mmol), 1-hydroxypyridine-2(*1H*)-thione (0.101 g, 0.881 mmol), DCC (0.163 g, 0.881 mmol), and DMAP (0.064 g, 0.528 mmol) were dissolved in CHCl<sub>3</sub> (5.3 mL). *t*BuSH (0.59 mL, 5.28 mmol) was added to the solution, and the solution was immediately irradiated with a tungsten filament light bulb (250 W) at room temperature for 1 h. The reaction was concentrated, and the residue was purified by column chromatography eluting with hexanes/EtOAc (2:1) to EtOAc with 1% *v/v* Et<sub>3</sub>N to give 0.170 g (63%) of **31** as yellow oil: <sup>1</sup>H NMR (CDCl<sub>3</sub>, 300 MHz) δ 7.71-7.66 (comp, 4 H), 7.42-7.34 (comp, 6 H), 4.72-4.64 (m, 1 H), 4.36-4.29 (comp, 2 H), 3.72 (s, 3 H), 3.22-3.18 (m, 1 H), 3.10 (s, 3 H), 2.93 (dd, *J* = 10.5, 4.2 Hz, 1 H), 2.84 (dd, *J* = 8.4, 5.4 Hz, 1 H), 2.77 (dd, *J* = 5.7, 3.9 Hz, 1 H), 2.48-2.38 (m, 1 H), 2.31-2.22 (m, 1 H), 1.66-1.58 (comp, 2 H), 1.52-1.48 (m, 1 H), 1.41-1.35 (comp, 3 H), 1.13 (dd, *J* = 16.2, 2.4 Hz, 1 H), 1.07 (s, 9 H); <sup>13</sup>C NMR (CDCl<sub>3</sub>, 75 MHz) δ 173.7, 135.9, 135.8, 134.8, 134.3, 129.5, 127.4, 127.4, 96.0, 79.3, 78.8, 77.2, 66.4, 60.3, 55.3, 52.4, 47.4, 46.6, 37.7, 34.7, 27.0, 24.7, 19.2; IR (neat) 2951, 2889, 2857, 1737, 1428, 1262, 1229, 1107, 1044 cm<sup>-1</sup>; HRMS (ESI) *m/z* 510.2673 [C<sub>29</sub>H<sub>40</sub>NO<sub>5</sub>Si (M+H) requires 510.2670].

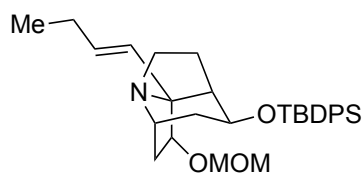

**33**

***E*-8-(but-1'-en-1'-yl)-3-[(*tert*-butyldiphenylsilyl)oxy]-9-methyloxymethyloxy-7-azatricyclo[5.3.0.0<sup>4,8</sup>]decane (**33**).** To a stirred solution of **32** (0.212 g, 0.44 mmol) and 1-phenyl-5-propylsulfonyl-1*H*-tetrazole (0.335 g, 1.33 mmol) in DME (15 mL) at -55 °C was added KHMDS (3.52 mL, 0.5 M in toluene, 11.76 mmol) dropwise. The resulting solution was stirred for 1 h at -55 °C and warmed to room temperature. After stirring for 1 h at room temperature, the reaction mixture was quenched with sat. NaCl solution (5 mL). The separated aqueous layers were extracted with EtOAc (3 × 10 mL), and the combined organic layers were dried (Na<sub>2</sub>SO<sub>4</sub>), filtered, and then concentrated. The crude residue was purified by column chromatography eluting with hexanes/EtOAc (3:1 to 1:1) to EtOAc with 1% *v/v* Et<sub>3</sub>N to give 0.240 g (89%) of **33** as colorless oil: <sup>1</sup>H NMR (CDCl<sub>3</sub>, 300 MHz) δ

7.72-7.66 (comp, 4 H), 7.41-7.33 (comp, 6 H), 5.54 (dt,  $J = 15.6, 6.3$  Hz, 1 H), 5.26 (d,  $J = 15.9$  Hz, 1 H), 4.66-4.60 (m, 1 H), 4.35 (d,  $J = 6.6$  Hz, 1 H), 4.32 (d,  $J = 6.6$  Hz, 1 H), 3.95 (dd,  $J = 10.5, 3.0$  Hz, 1 H), 3.14-3.07 (m, 1 H), 3.09 (s, 3 H), 2.88-2.68 (m, 2 H), 2.36-2.29 (m, 1 H), 2.22 (dd,  $J = 6.0, 3.6$  Hz, 1 H), 2.12 (ddd,  $J = 12.9, 8.4, 4.5$  Hz, 1 H), 2.00 (dt,  $J = 7.5, 1.5$  Hz, 2 H), 1.61-1.51 (m, 1 H), 1.42-1.36 (m, 1 H), 1.07 (s, 9 H), 0.95 (t,  $J = 7.2$  Hz, 3 H);  $^{13}\text{C}$  NMR ( $\text{CDCl}_3$ , 75 MHz)  $\delta$  135.9, 135.8, 132.4, 130.9, 129.3, 127.4, 96.0, 82.1, 75.7, 66.9, 60.3, 55.1, 47.4, 47.0, 37.3, 35.2, 27.0, 25.5, 24.8, 19.2, 13.7; IR (neat) 2958, 2932, 2886, 2857, 1472, 1428, 1106, 1043, 703  $\text{cm}^{-1}$ ; HRMS (ESI)  $m/z$  506.3092 [ $\text{C}_{31}\text{H}_{44}\text{NO}_3\text{Si}$  (M+H) requires 506.3085].

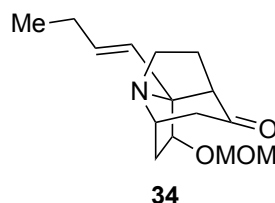

***E*-8-(but-1'-en-1'-yl)-9-methyloxymethoxy-7-azatricyclo[5.3.0.0<sup>4,8</sup>]decan-3-one (34).** To a stirred solution of C8 alcohol (0.013 g, 0.049 mmol) in  $\text{CH}_2\text{Cl}_2$  (1 mL) and DMSO (0.5 mL) at room temperature was added  $\text{Et}_3\text{N}$  (0.068 mL, 0.486 mmol) followed by  $\text{SO}_3 \cdot \text{Py}$  (0.039 g, 0.243 mmol). The resulting solution was stirred for 4 h at room temperature and then sat.  $\text{NaHCO}_3$  solution (2 mL) was added. The separated aqueous layers were extracted with  $\text{EtOAc}$  ( $3 \times 5$  mL), and the combined organic layers were dried ( $\text{Na}_2\text{SO}_4$ ), filtered, and then concentrated. The crude residue was purified by column chromatography eluting with hexanes/ $\text{EtOAc}$  (1:1) to  $\text{EtOAc}$  with 1% v/v  $\text{Et}_3\text{N}$  to give 0.0099 g (77%) of **34** as colorless oil:  $[\alpha]_D^{24} -156$  ( $c = 0.3$ ,  $\text{CHCl}_3$ );  $^1\text{H}$  NMR ( $\text{CDCl}_3$ , 300 MHz)  $\delta$  5.74 (dt,  $J = 15.9, 6.9$  Hz, 1 H), 5.41 (dt,  $J = 15.9, 1.5$  Hz, 1 H), 4.59 (s, 2 H), 4.21 (d,  $J = 8.7$  Hz, 1 H), 3.53 (t,  $J = 6.3$  Hz, 1 H), 3.33 (s, 3 H), 3.16-3.00 (m, 2 H), 2.85 (d,  $J = 6.6$  Hz, 1 H), 2.58-2.50 (m, 1 H), 2.45-2.36 (m, 1 H), 2.19-2.11 (m, 1 H), 2.07 (dt,  $J = 7.8, 1.5$  Hz, 2 H), 1.69-1.60 (comp, 2 H), 0.99 (t,  $J = 7.5$  Hz, 3 H);  $^{13}\text{C}$  NMR ( $\text{CDCl}_3$ , 75 MHz)  $\delta$  209.3, 132.2, 129.9, 95.8, 82.0, 79.7, 60.4, 56.9, 55.6, 46.6, 41.2, 38.6, 30.9, 25.5, 13.6; IR (neat) 2958, 2893, 1722, 1106, 1091, 1040  $\text{cm}^{-1}$ ; HRMS (ESI)  $m/z$  266.1754 [ $\text{C}_{15}\text{H}_{24}\text{NO}_3$  (M+H) requires 266.1751].

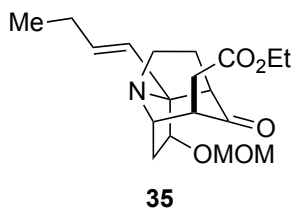

***E*-8-(But-1'-en-1'-yl)-3-ethoxycarbonylmethyl-9-methyloxymethoxy-7-azatricyclo[5.3.0.0<sup>4,8</sup>]decan-3-one (35).** Freshly prepared LDA (0.42 mL, 0.2 M in THF, 0.084 mmol) was added to a stirred solution of **34** (0.016 g, 0.060 mmol) in THF (1.2 mL) at  $-10$   $^\circ\text{C}$ , and the resulting solution was stirred for 1 h at  $-10$   $^\circ\text{C}$ , whereupon ethyl iodoacetate (0.011 mL, 0.090 mmol) was added

at  $-10\text{ }^{\circ}\text{C}$ . The resulting solution was stirred for 30 min. DABCO (20 mg) was added, and the solution was warmed to room temperature. Brine (5 mL) and EtOAc (5 mL) were added, and the layers were separated. The aqueous layer was extracted with EtOAc ( $2 \times 10\text{ mL}$ ), and the combined organic layers were dried ( $\text{Na}_2\text{SO}_4$ ), filtered, and then concentrated under reduced pressure. The crude residue was purified by column chromatography eluting with hexanes/EtOAc (1:1) to EtOAc with 1% v/v  $\text{Et}_3\text{N}$  to give 0.013 g (62%) of **35** as colorless oil along with 0.0025 g (16%) of starting material:  $^1\text{H}$  NMR ( $\text{CDCl}_3$ , 300 MHz)  $\delta$  5.72 (dt,  $J = 15.6, 6.3\text{ Hz}$ , 1 H), 5.41 (d,  $J = 15.6\text{ Hz}$ , 1 H), 4.57 (s, 2 H), 4.22-4.14 (comp, 3 H), 3.40 (d,  $J = 5.7\text{ Hz}$ , 1 H), 3.33 (s, 3 H), 3.18-3.07 (m, 2 H), 2.88-2.75 (comp, 3 H), 2.54 (dd,  $J = 15.6, 10.8\text{ Hz}$ , 1 H), 2.41-2.32 (m, 1 H), 2.19-2.02 (comp, 3 H), 1.74 (d,  $J = 12.9\text{ Hz}$ , 1 H), 1.70-1.62 (m, 1 H), 1.27 (t,  $J = 7.2\text{ Hz}$ , 3 H), 0.99 (t,  $J = 7.5\text{ Hz}$ , 3 H);  $^{13}\text{C}$  NMR ( $\text{CDCl}_3$ , 75 MHz)  $\delta$  171.7, 132.3, 129.3, 95.6, 82.2, 78.9, 63.0, 60.9, 56.6, 55.7, 48.3, 45.7, 41.8, 38.9, 30.2, 25.5, 14.2, 13.6; IR (neat) 2960, 1732, 1715, 1151, 1106, 1039  $\text{cm}^{-1}$ ; HRMS (ESI)  $m/z$  352.2123 [ $\text{C}_{19}\text{H}_{30}\text{NO}_5$  (M+H) requires 352.2119].

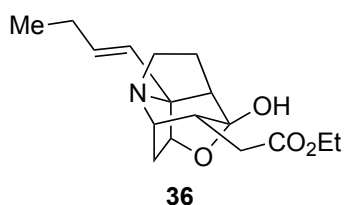

***E*-2-(But-1'-en-1'-yl)-10-ethoxycarbonylmethyl-11-oxa-3-azatetracyclo[5.3.1.0<sup>2,6</sup>.0<sup>3,9</sup>]undecan-7-ol (36).** DBU (0.024 mL, 0.16 mmol) was added to a stirred solution of **35** (0.014 g, 0.040 mmol) in toluene (0.4 mL) in a 5 mL vial at room temperature. The vial was sealed and heated with stirring at  $130\text{ }^{\circ}\text{C}$  (bath temperature) for 4 h. The reaction was cooled to room temperature and filtered through a pad of silica gel (EtOAc to EtOAc-MeOH 10:1) to afford the epimerized product as yellow oil (0.014 g,  $\sim 100\%$ ), which was dissolved in  $\text{CH}_2\text{Cl}_2$  (0.4 mL) and cooled to  $0\text{ }^{\circ}\text{C}$ . TFA (0.31 mL, 4.0 mmol) was then added with stirring, and the resulting solution was warmed to room temperature and stirred for 1 h. 5 M NaOH (1 mL),  $\text{CH}_2\text{Cl}_2$  (5 mL), and  $\text{NaHCO}_3$  (5 mL) were then added sequentially, and the layers were separated. The aqueous layer was extracted with  $\text{CH}_2\text{Cl}_2$  ( $3 \times 5\text{ mL}$ ), and the combined organic layers were dried ( $\text{Na}_2\text{SO}_4$ ), filtered, and concentrated. The crude residue was purified by column chromatography eluting with EtOAc with 1% v/v  $\text{Et}_3\text{N}$  to give 0.010 g (81%) of **36** as light yellow oil:  $[\alpha]_{\text{D}}^{25} +17$  ( $c = 0.5$ ,  $\text{CHCl}_3$ ); IR (neat) 3349, 2962, 1733, 1325, 1273, 1227, 1179, 1038, 972  $\text{cm}^{-1}$ ; HRMS (ESI)  $m/z$  308.1859 [ $\text{C}_{17}\text{H}_{26}\text{NO}_4$  (M+H) requires 308.1856]; The  $^1\text{H}$  and  $^{13}\text{C}$  NMR data were consistent with those reported by Overman (see Table 1 and 2).<sup>3</sup>



**Table 1** Comparison of  $^1\text{H}$  NMR data of **36** with reported literature values

| $^1\text{H}$ (Hz) Overman <sup>3</sup> | $^1\text{H}$ (Hz)    |
|----------------------------------------|----------------------|
| 5.70 dt (15.5, 6.3)                    | 5.72, dt (15.5, 6.0) |
| 5.47 dt (15.5, 1.4)                    | 5.48 d (15.5)        |
| 4.23 br t (2.0)                        | 4.25 br s            |
| 4.16 qd (7.2, 1.3)                     | 4.19 qd (7.0, 2.0)   |
| 3.21-3.16 br s                         | 3.19 br s            |
| 3.08-2.95 m                            | 3.06-2.96 m          |
| 2.91 dd (17.0, 9.3)                    | 2.92 dd (17.0, 9.5)  |
| 2.44 t (3.4)                           | 2.45 t (3.5)         |
| 2.23-2.17 m                            | 2.23-2.19 m          |
| 2.09-2.00 m                            | 2.09-2.03 m          |
| 1.89-1.78 m                            | 1.89-1.81 comp       |
| 1.63 dt (12.2, 3.2)                    | 1.64 dt (12.0, 3.0)  |
| 1.26 t (7.2)                           | 1.28 t (7.0)         |
| 0.97 t (7.4)                           | 0.99 t (7.5)         |

**Table 2** Comparison of  $^{13}\text{C}$  NMR data of **36** with reported literature values

| $^{13}\text{C}$ Overman <sup>3</sup> | $^{13}\text{C}$ |
|--------------------------------------|-----------------|
| 175.5                                | 175.6           |
| 132.6                                | 132.6           |
| 126.9                                | 127.2           |
| 104.8                                | 104.8           |
| 82.1                                 | 82.3            |
| 81.6                                 | 81.6            |
| 65.2                                 | 65.3            |
| 61.5                                 | 61.5            |
| 55.9                                 | 56.0            |
| 47.7                                 | 47.8            |
| 36.8                                 | 36.9            |
| 33.1                                 | 33.2            |
| 32.4                                 | 32.5            |
| 26.6                                 | 26.8            |
| 25.3                                 | 25.4            |
| 14.1                                 | 14.1            |
| 13.5                                 | 13.6            |

STANDARD IN OBSERVE

Pulse Sequence: zgpg30  
Solvent: CDCl3  
Ambient Temperature:  
Mercury-4800B "mrfo"  
Relax. delay 2.000 sec  
Pulse 16.4 degrees  
Acq. time 2.856 sec  
Width 5882.2 Hz  
16 repetitions  
OBSERVE N1: 400.268875 MHz  
DATA PROCESSING  
Line broadening 0.1 Hz  
FT size 32788  
Total time 1 min, 52 sec

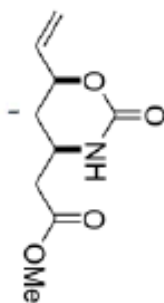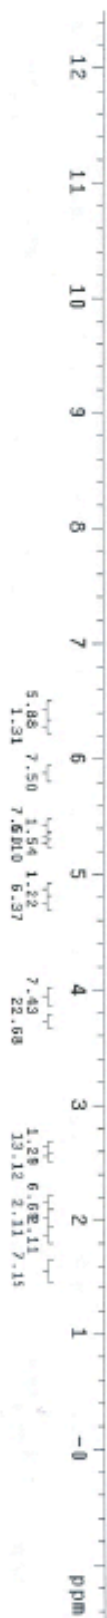

13C NMR

Pulse Sequence: zgpg30  
Solvent: CDCl3  
Ambient temperature  
Mercury-40088 "mr6"  
Relax: delay 2.000 sec  
Pulse: zgpg30  
Acq: time 1.380 sec  
Width: 25138.8 Hz  
139 repetitions  
OBSERVE: C13, 100.627159 MHz  
DECUPLE: H1, 400.2689955 MHz  
Power: 38 dB  
Continuously on  
WALTZ-16 modulated  
DATA PROCESSING  
Line broadening 1.0 Hz  
FT size 65536  
Total time 2 hr, 2 min, 10 sec

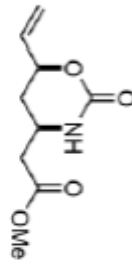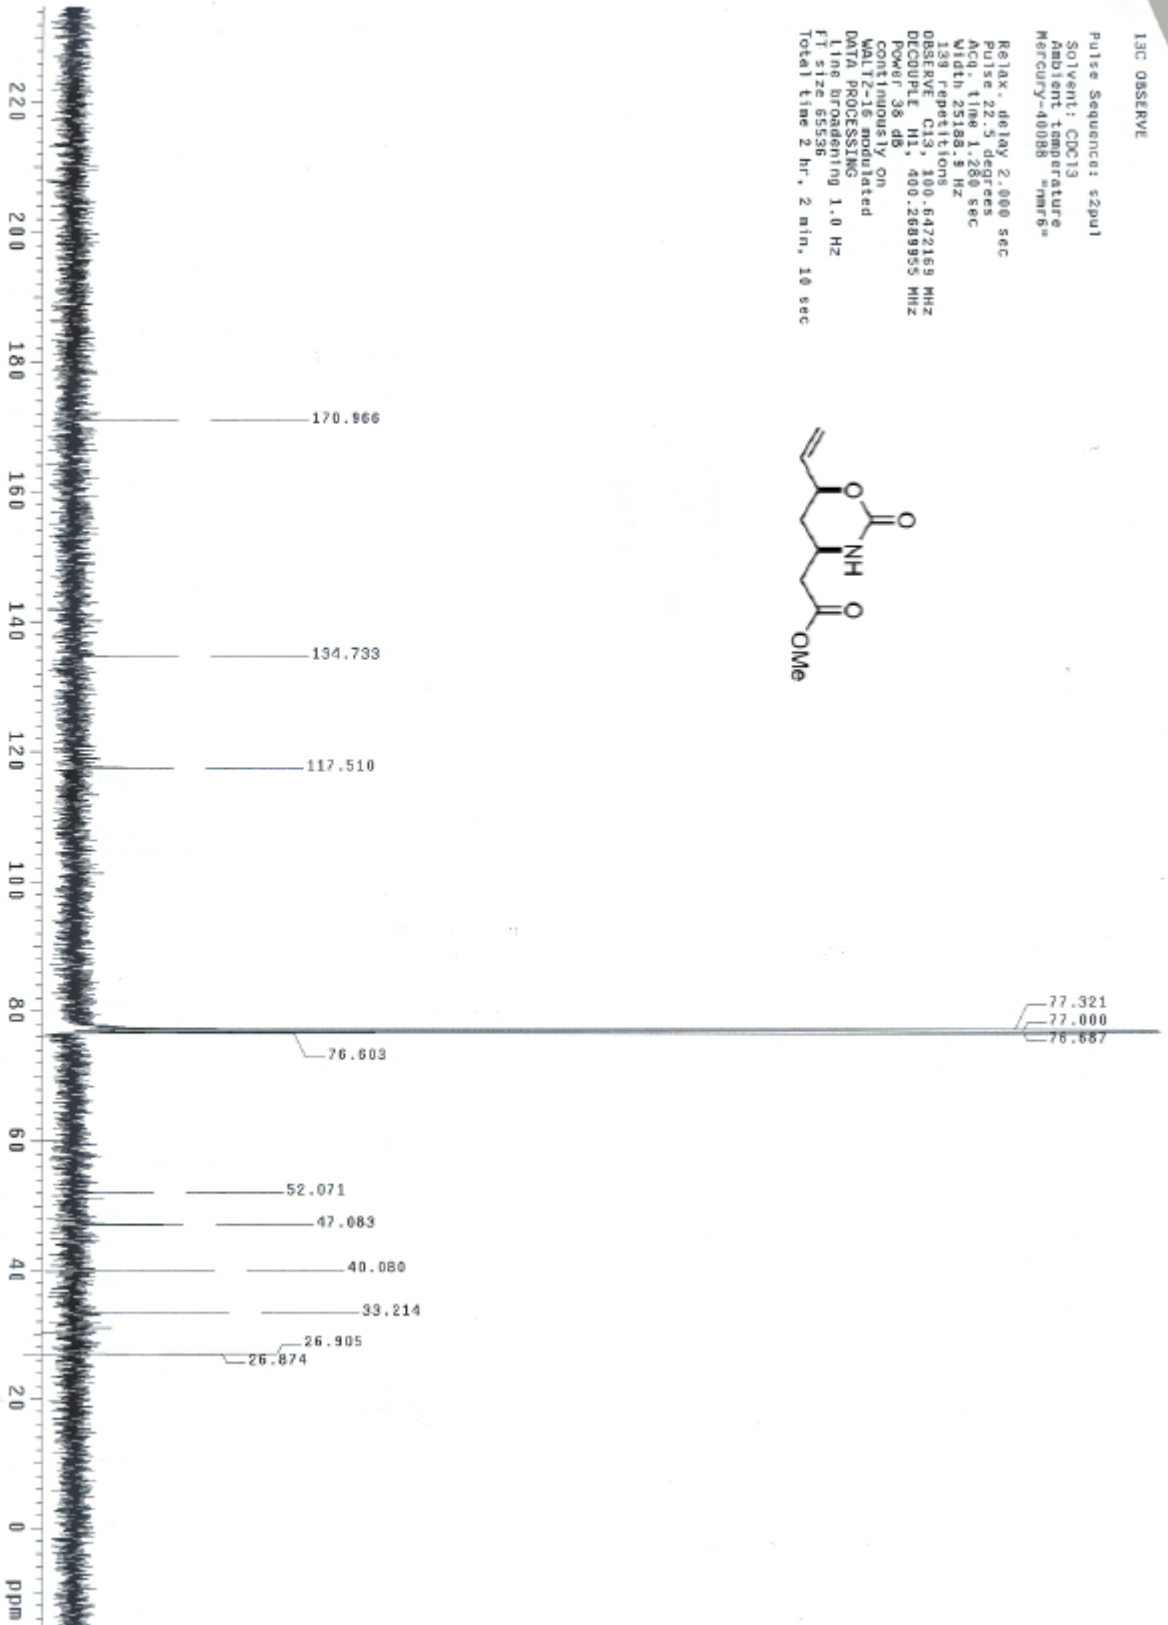

STANDARD 1H OBSERVE

Pulse Sequence: zgpg1  
Solvent: CDCl3  
Ambient Temperature  
Mercury-400MHz "narda"  
Relax: delay 2.000 sec  
Pulse: 18.4 degrees  
Acq: time 2.885 sec  
Width: 5602.2 Hz  
16 repetitions  
OBSERVE: H1, 400.2619785 MHz  
DATA PROCESSING  
Line broadening 0.1 Hz  
FT size 32768  
Total time 0 min, 0 sec

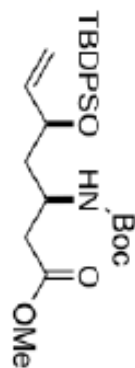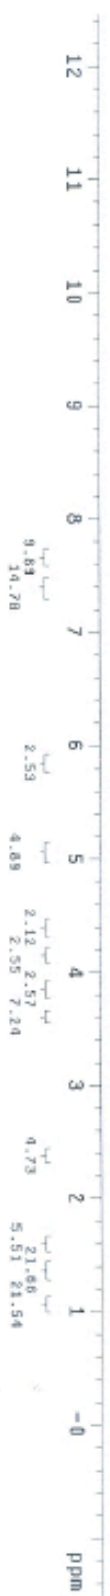

13C OBSERVE

Pulse Sequence: zgpg30  
Solvent: CDCl3  
Ambient temperature  
Mercury-400BB "mrs"

Relax. delay: 2.000 sec  
Pulse: zgpg30  
Acq. time: 1.280 sec  
Width: 25188.9 Hz  
588 repetitions  
OBSERVE: C13, 100.6472161 MHz  
DECUPLE: H1, 400.2689955 MHz  
Power: 36 db  
continuously on  
WALTZ-16 modulated  
DATA PROCESSING  
Line broadening: 1.0 Hz  
FT size: 65536  
Total time: 20 hr, 21 min, 48 sec

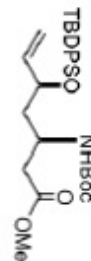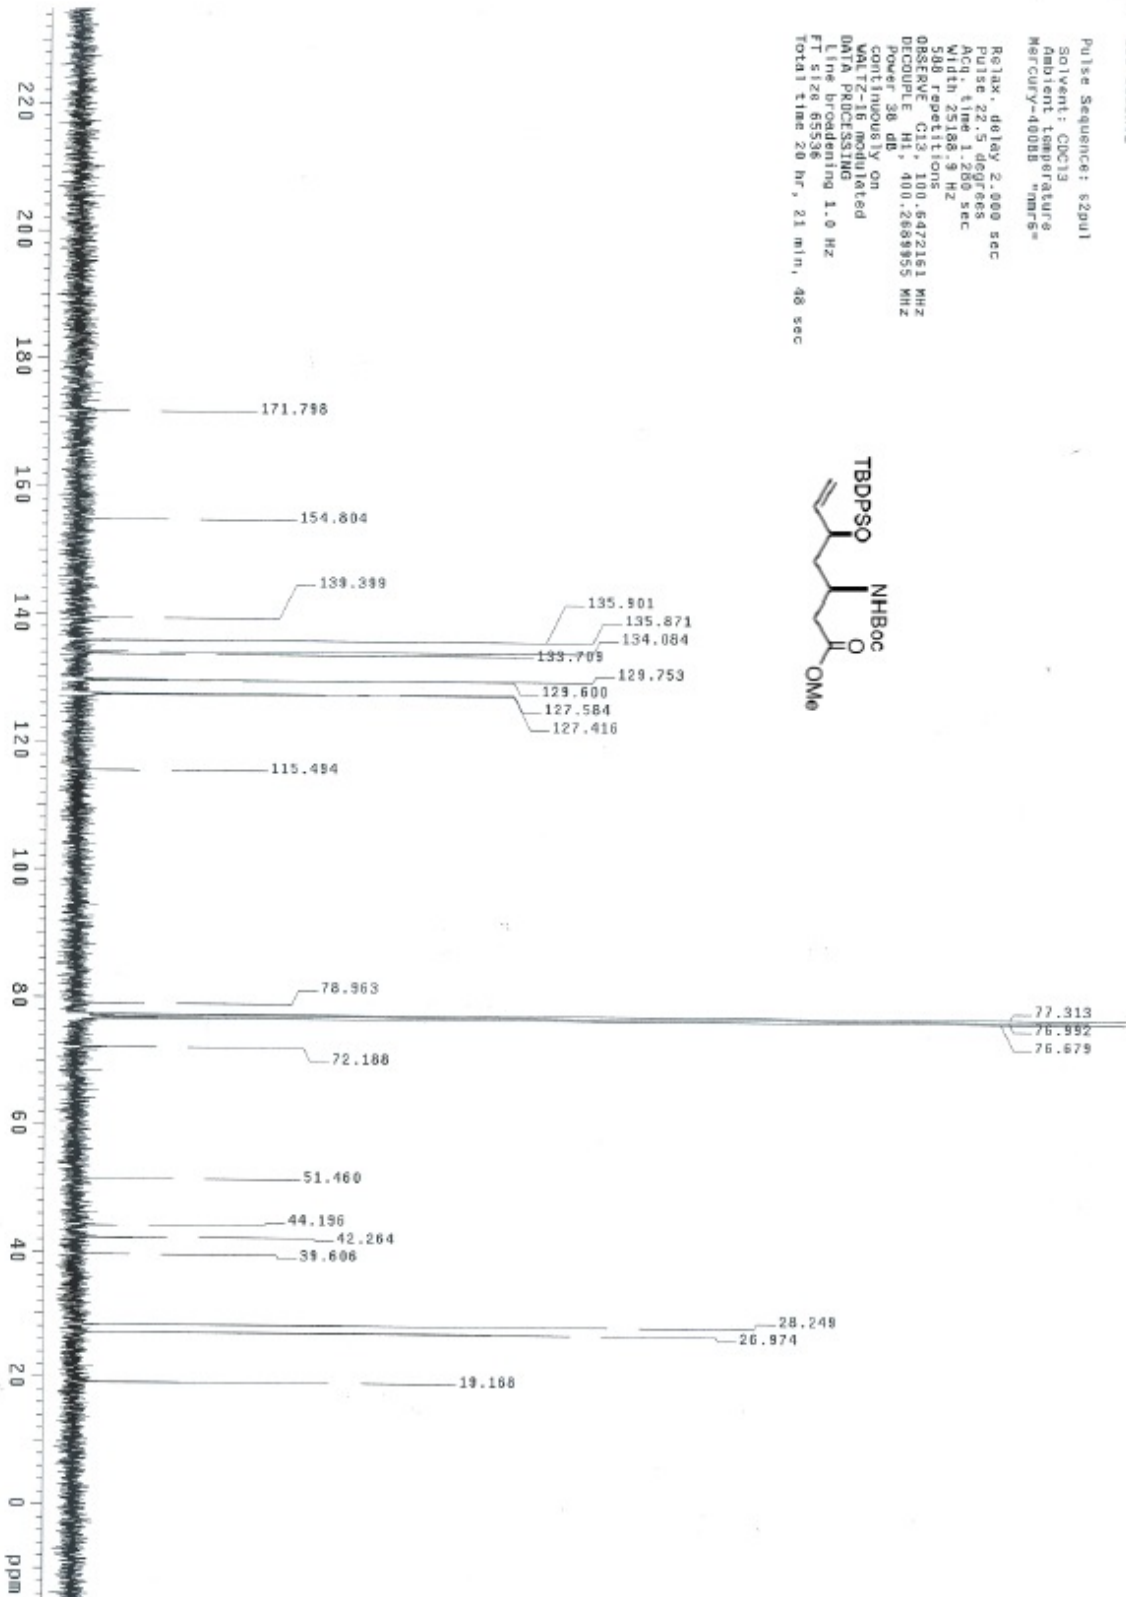

STANDARD 1H OBSERVE

Pulse Sequence: e2p01

Solvent: CDCl3

Acquire Temperature: Mercury-00008 "mertr"

Relax. delay: 2.000 sec

Pulse: 18.4 degrees

Acq. time: 2.856 sec

Width: 5602.2 Hz

11. Repetitions

OBSERVE: H1, 400.2669789 MHz

DATA PROCESSING

Line: DR00750

F1: 312.32750

Total time: 1 min, 52 sec

bc attached

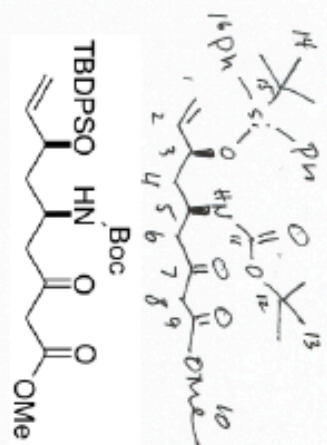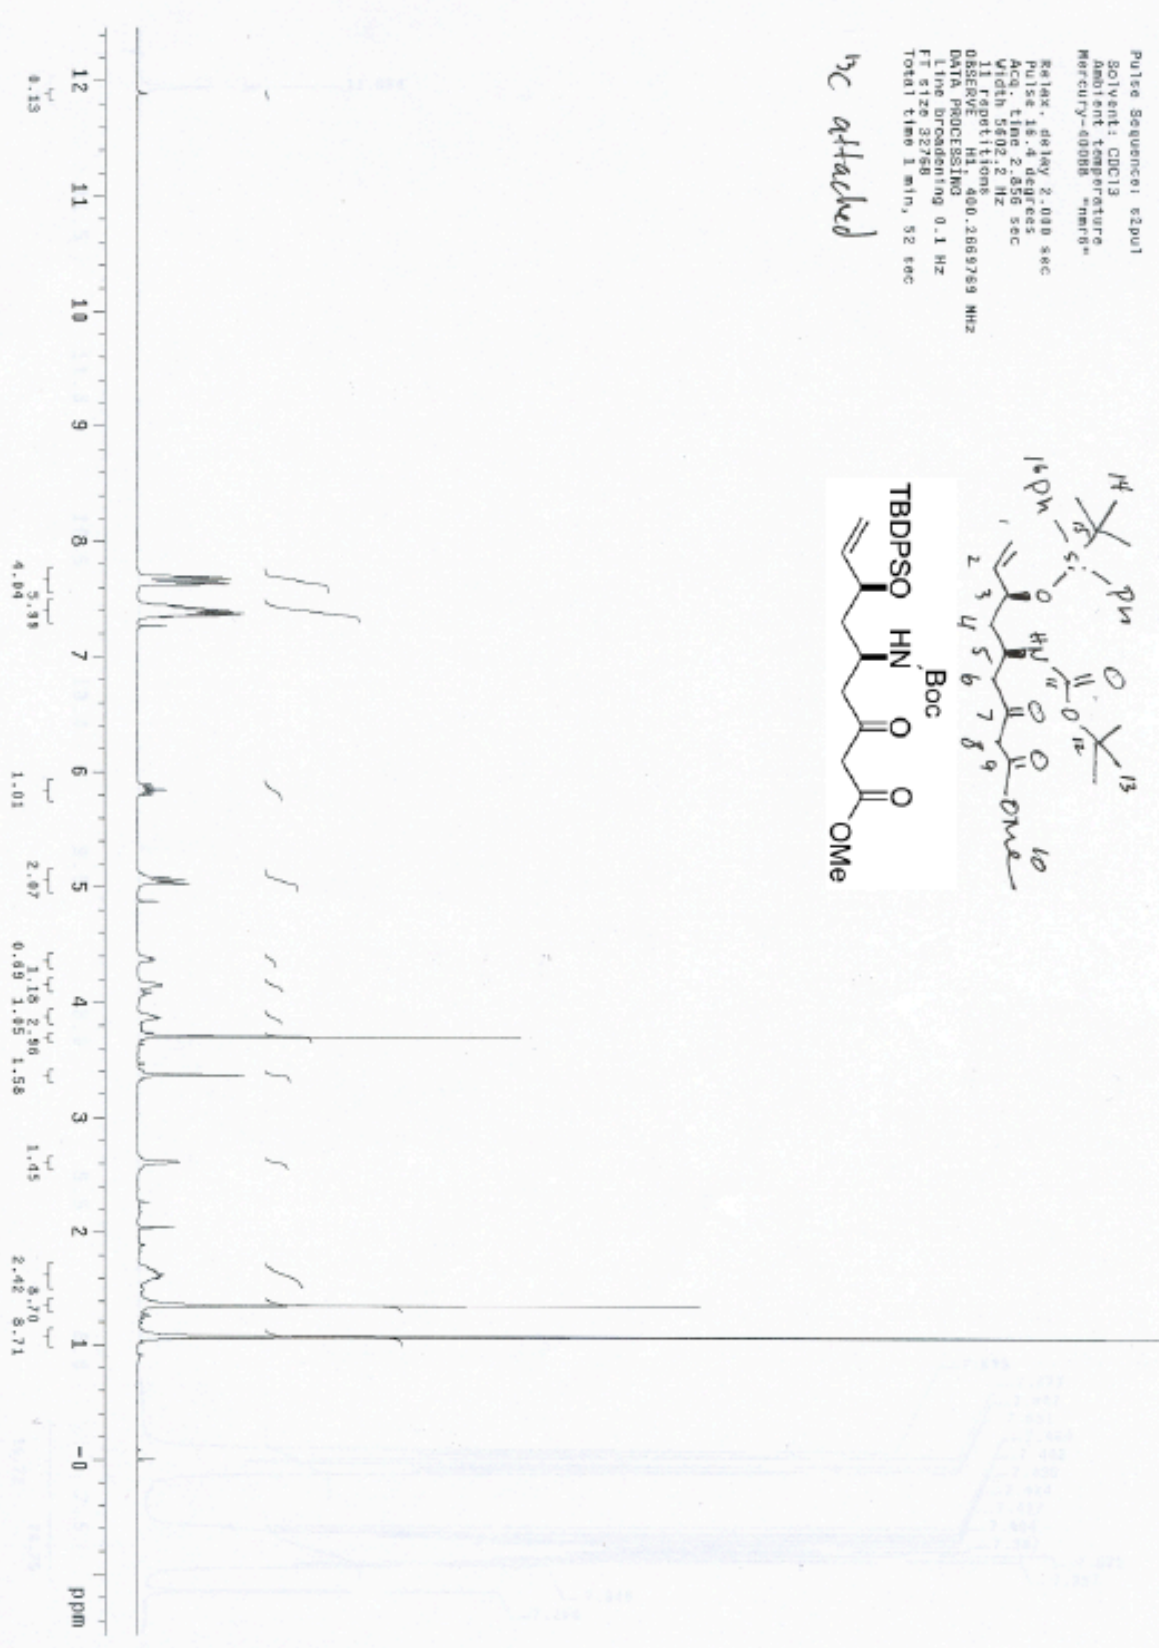

13C OBSERVE

Pulse Sequence: s2pul  
Solvent: CDCl3  
Ambient temperature  
Mercury-4000B "nmr6"  
Relax. delay 2.000 sec  
Pulse 22.5 degrees  
Acq. time 1.280 sec  
Width 25198.8 Hz  
622 repetitions  
OBSERVE C13, 100.622200 MHz  
DECUPLE H1, 400.268955 MHz  
Power 36 db  
continuously on  
MULTI-Acquisition  
DATA PROCESSING  
Time processing 1.0 Hz  
File size 6553  
Total time 20 hr, 21 min, 48 sec

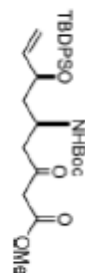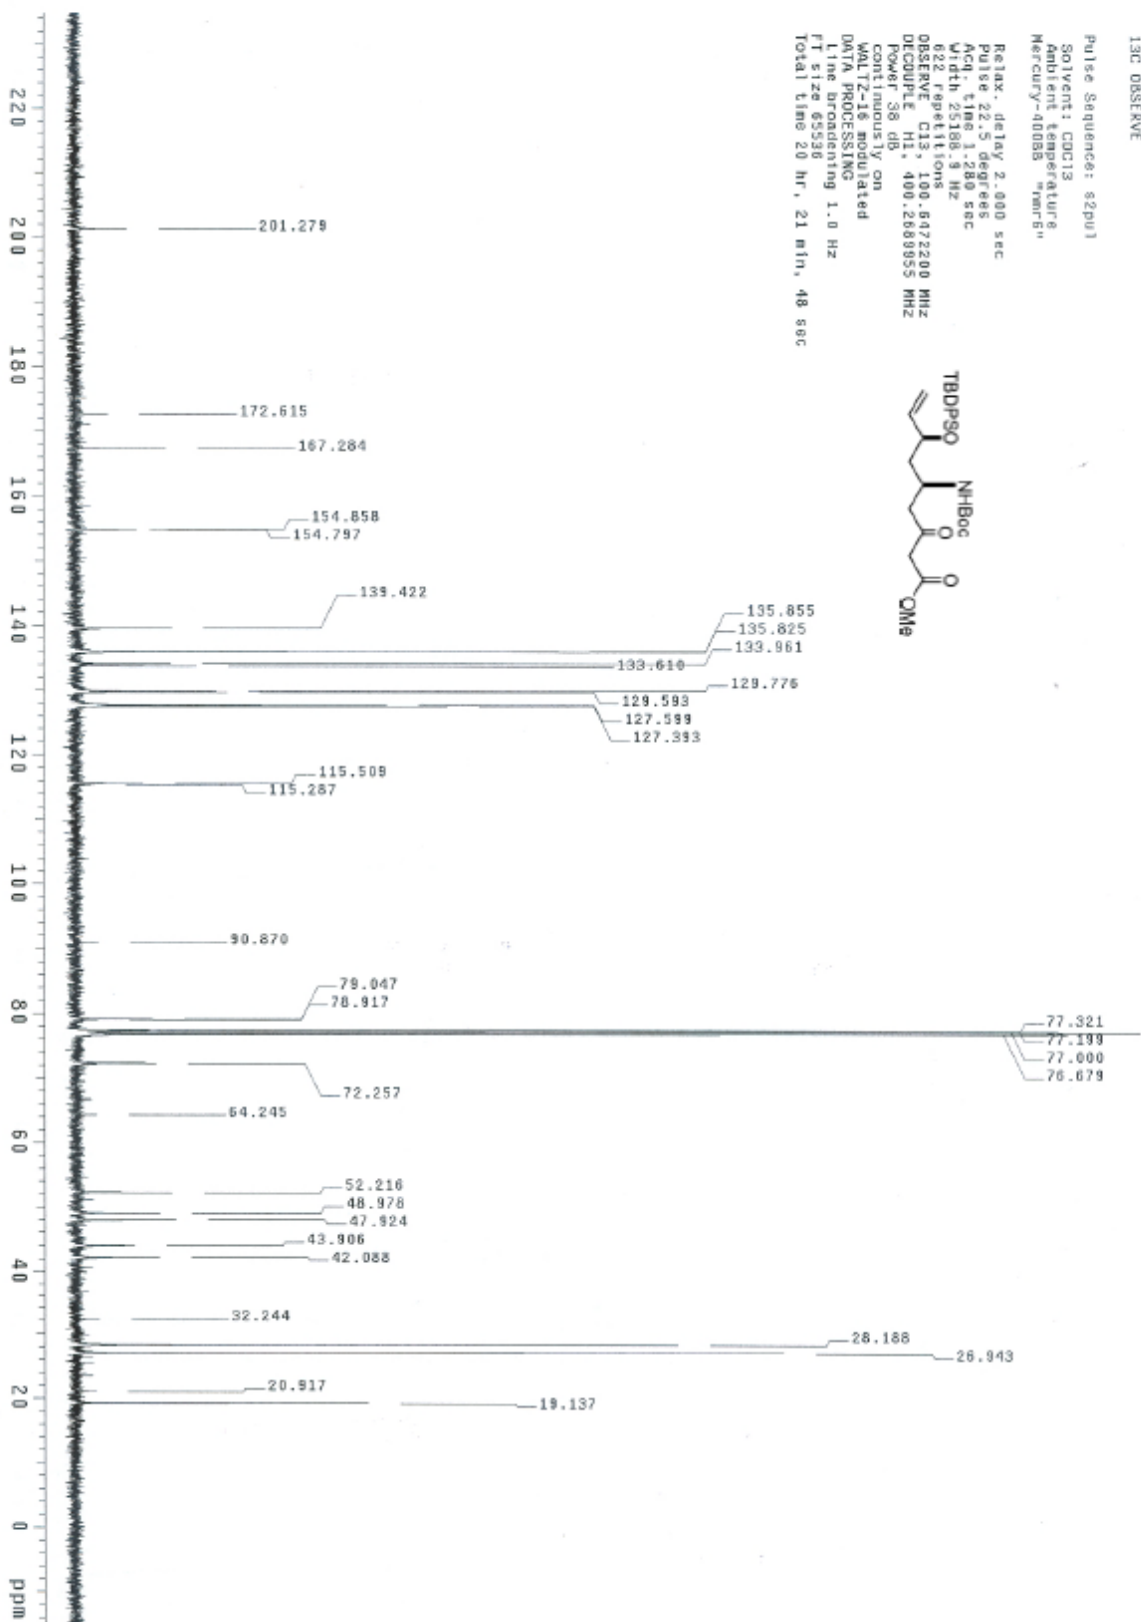

STANDARD IN OBSERVE

Pulse Sequence: zgpg30  
Solvent: CDCl3  
Acq. time 2.856 sec  
Mercury-400BB  
Relax. delay 2.600 sec  
Pulse 16.0 degrees  
Width 5002.2 Hz  
18 repetitions  
OBSERVE H1, 400.269839 MHz  
DATA PROCESSING  
Time broadening 0.1 Hz  
FI size 32786  
Total time 0 min, 0 sec

Attached 13C-NMR

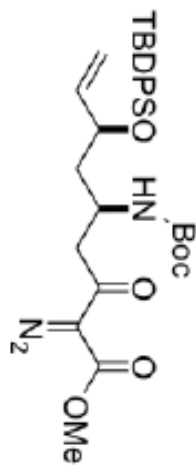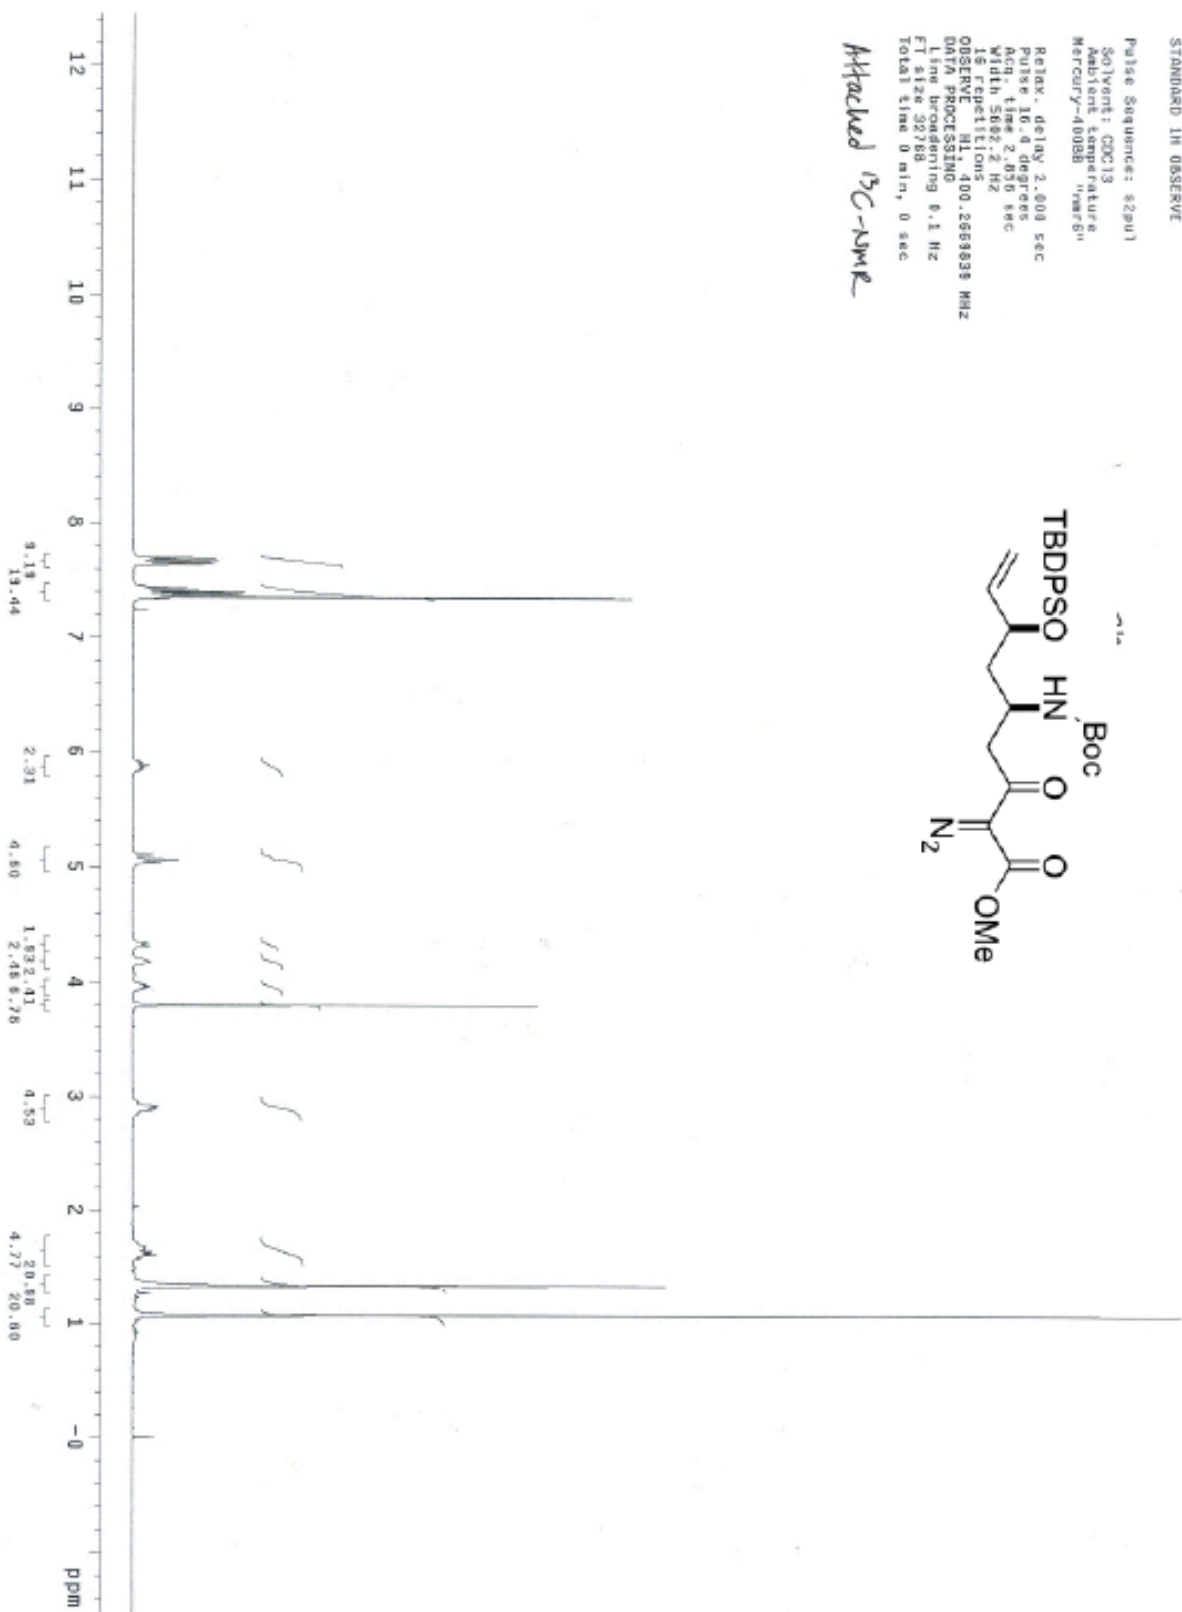



13C OBSERVE

Pulse Sequence: zgpg30  
Solvent: CDCl3  
Ambient Temperature  
Mercury-4000B "nmrB"

Relax. delay 2.000 sec  
Pulse 22.5 degrees  
Acq. time 1.260 sec  
Width 25188.9 Hz  
009 repetitions  
OBSERVE C13: 400.647200 MHz  
DECOUPLE H1: 400.268955 MHz  
Continuous Tx on  
WALTZ-16 modulated  
DATA PROCESSING  
Line broadening 1.0 Hz  
FT size 6558  
Total time 28 hr, 21 min, 48 sec

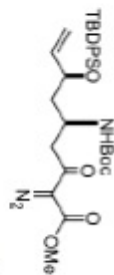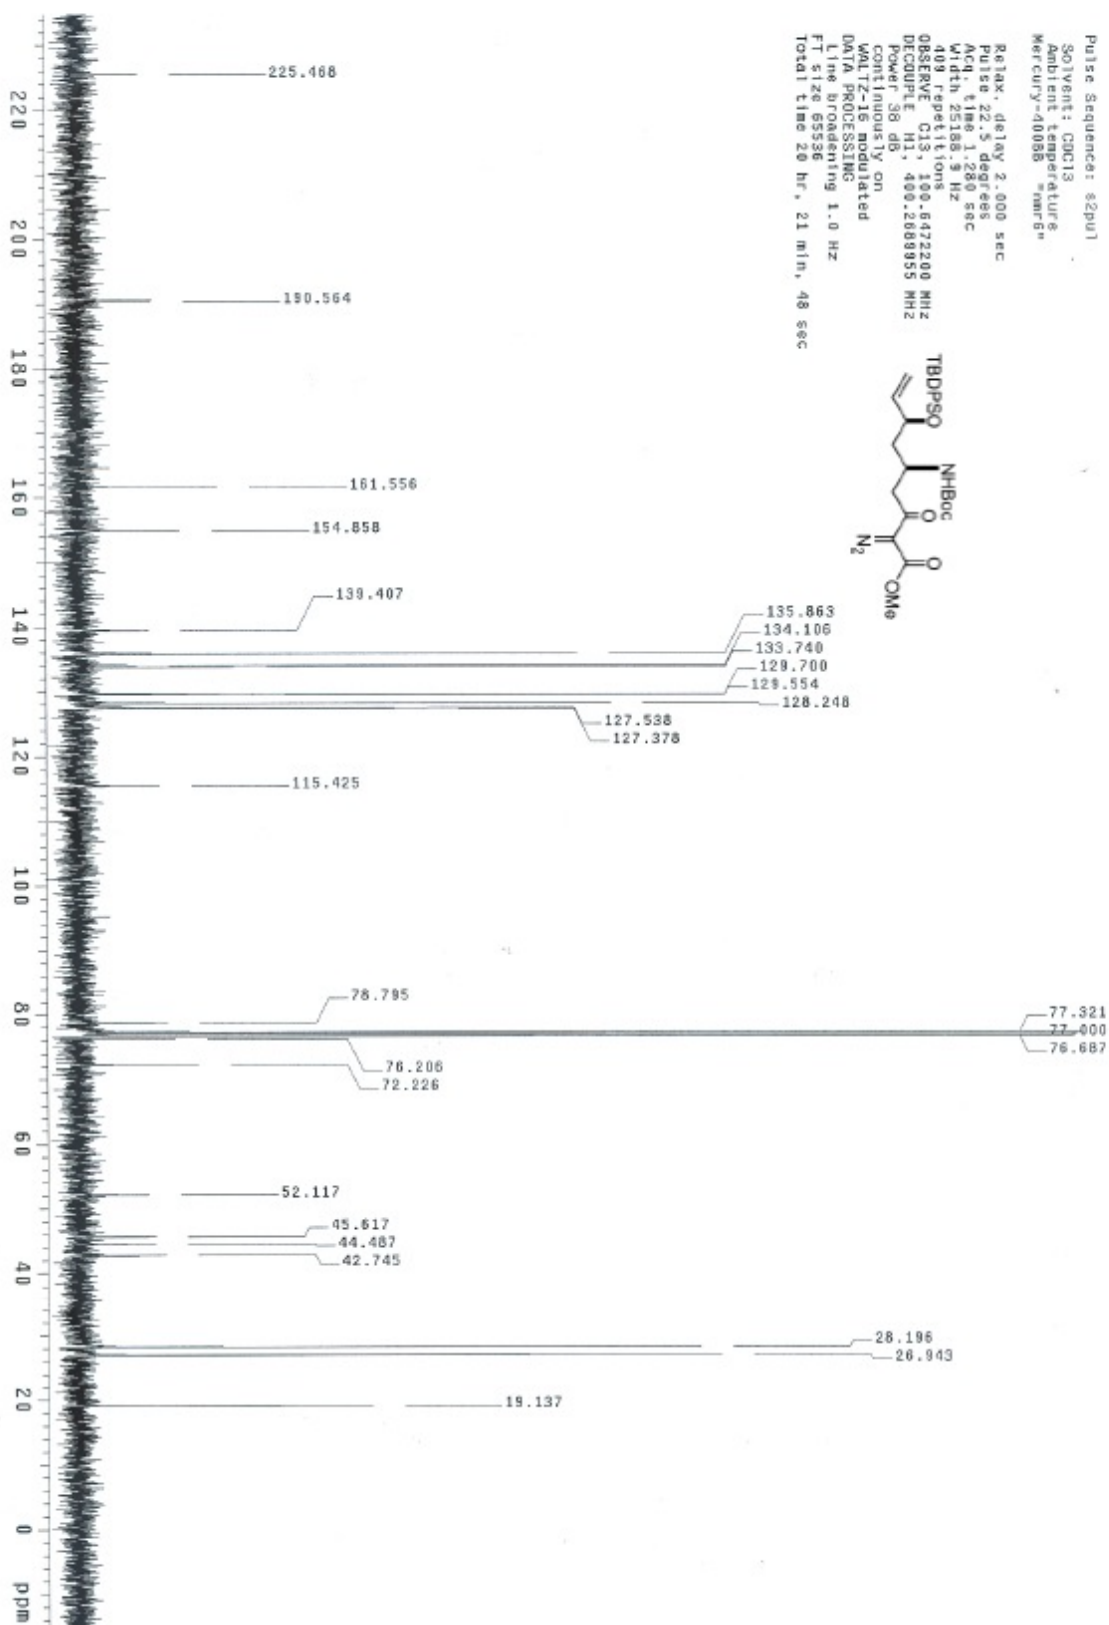



CF-1-046  
 Pulse Sequence: zgpg30  
 Solvent: CDCl3  
 Ambient Temperature  
 UNITplus-300 mmr2  
 Relax. delay 1.000 sec  
 Pulse 15.0 degrees  
 Acq. time 3.813 sec  
 Width 4156.4 Hz  
 16 repetitions  
 DSERVE HI, 300.1390295 MHz  
 DATA PROCESSING  
 Line broadening 0.1 Hz  
 FI size 32760  
 Total time 1 min, 17 sec

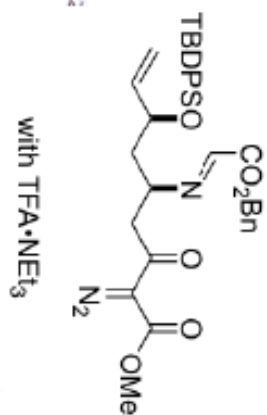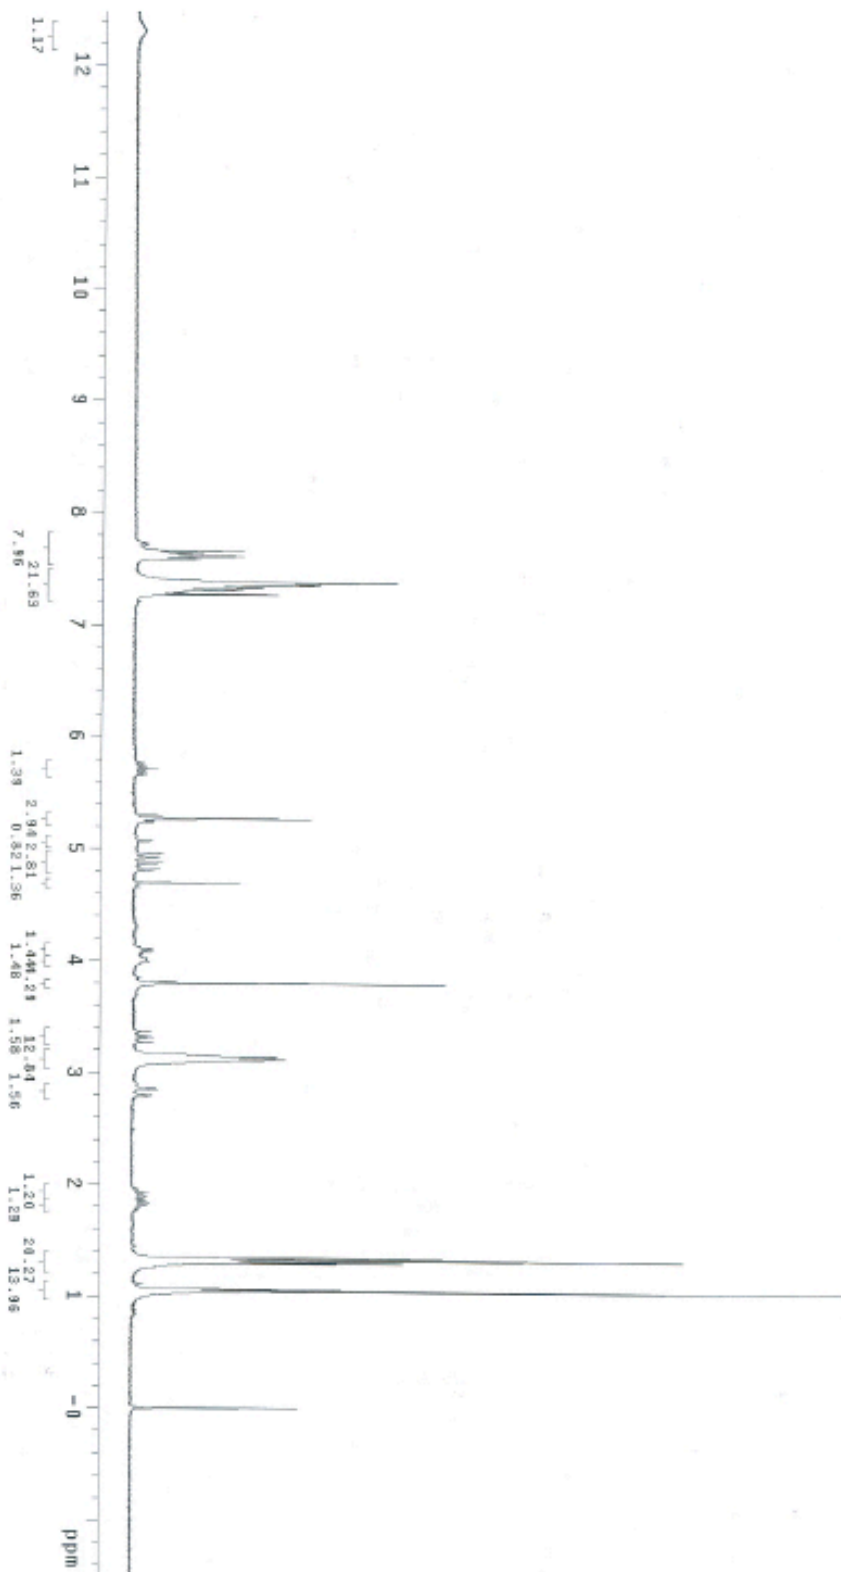

STANDARD 1H OBSERVE

Pulse Sequence: zgpg30  
Solvent: CDCl3  
Ambient Temperature  
Mercury-400MS "hmr30"

Relax. delay 2.000 sec  
Pulse time 9.000 sec  
Acq time 2.885 sec  
Width 5682.2 Hz  
32 repetitions  
OBSERVE N1 400.2689785 MHz  
DATA PROCESSING  
Line broadening 0.1 Hz  
FT size 32768  
Total time 0 min, 0 sec

*BC-attached*

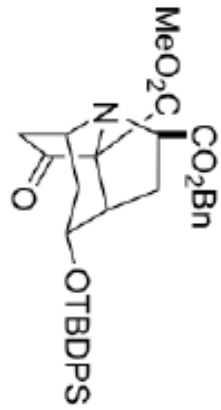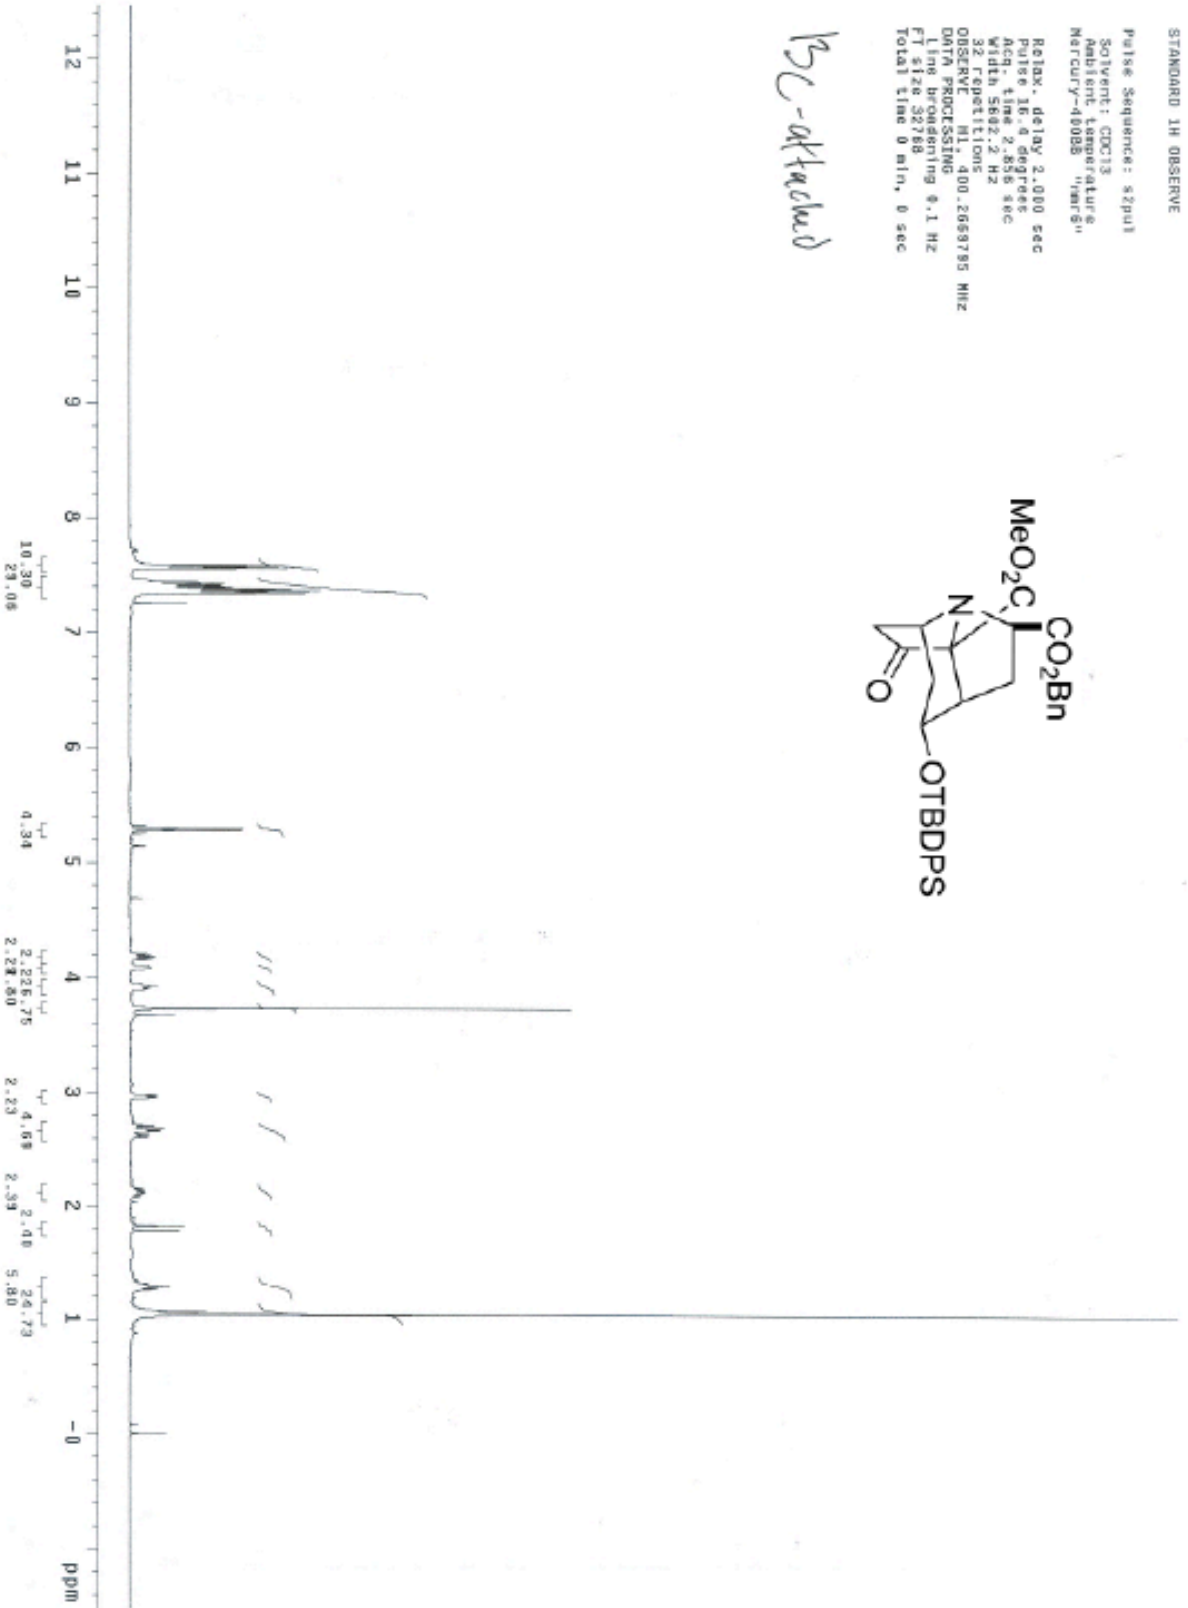



STANDARD 1H OBSERVE

Pulse Sequence: s2pul1

Solvent: CDCl3

Ambient temperature

UNITYplus-300 "nmr2"

Relax. delay 1.000 sec

Pulse 15.0 degree

Acq. time 3.013 sec

Width 4196.4 Hz

16 repetitions

OBSERVE H1, 300.1399311 MHz

DATA PROCESSING

Line broadening 0.1 Hz

FT size 32768

Total time 1 min, 17 sec

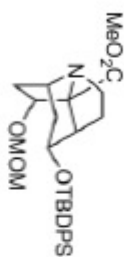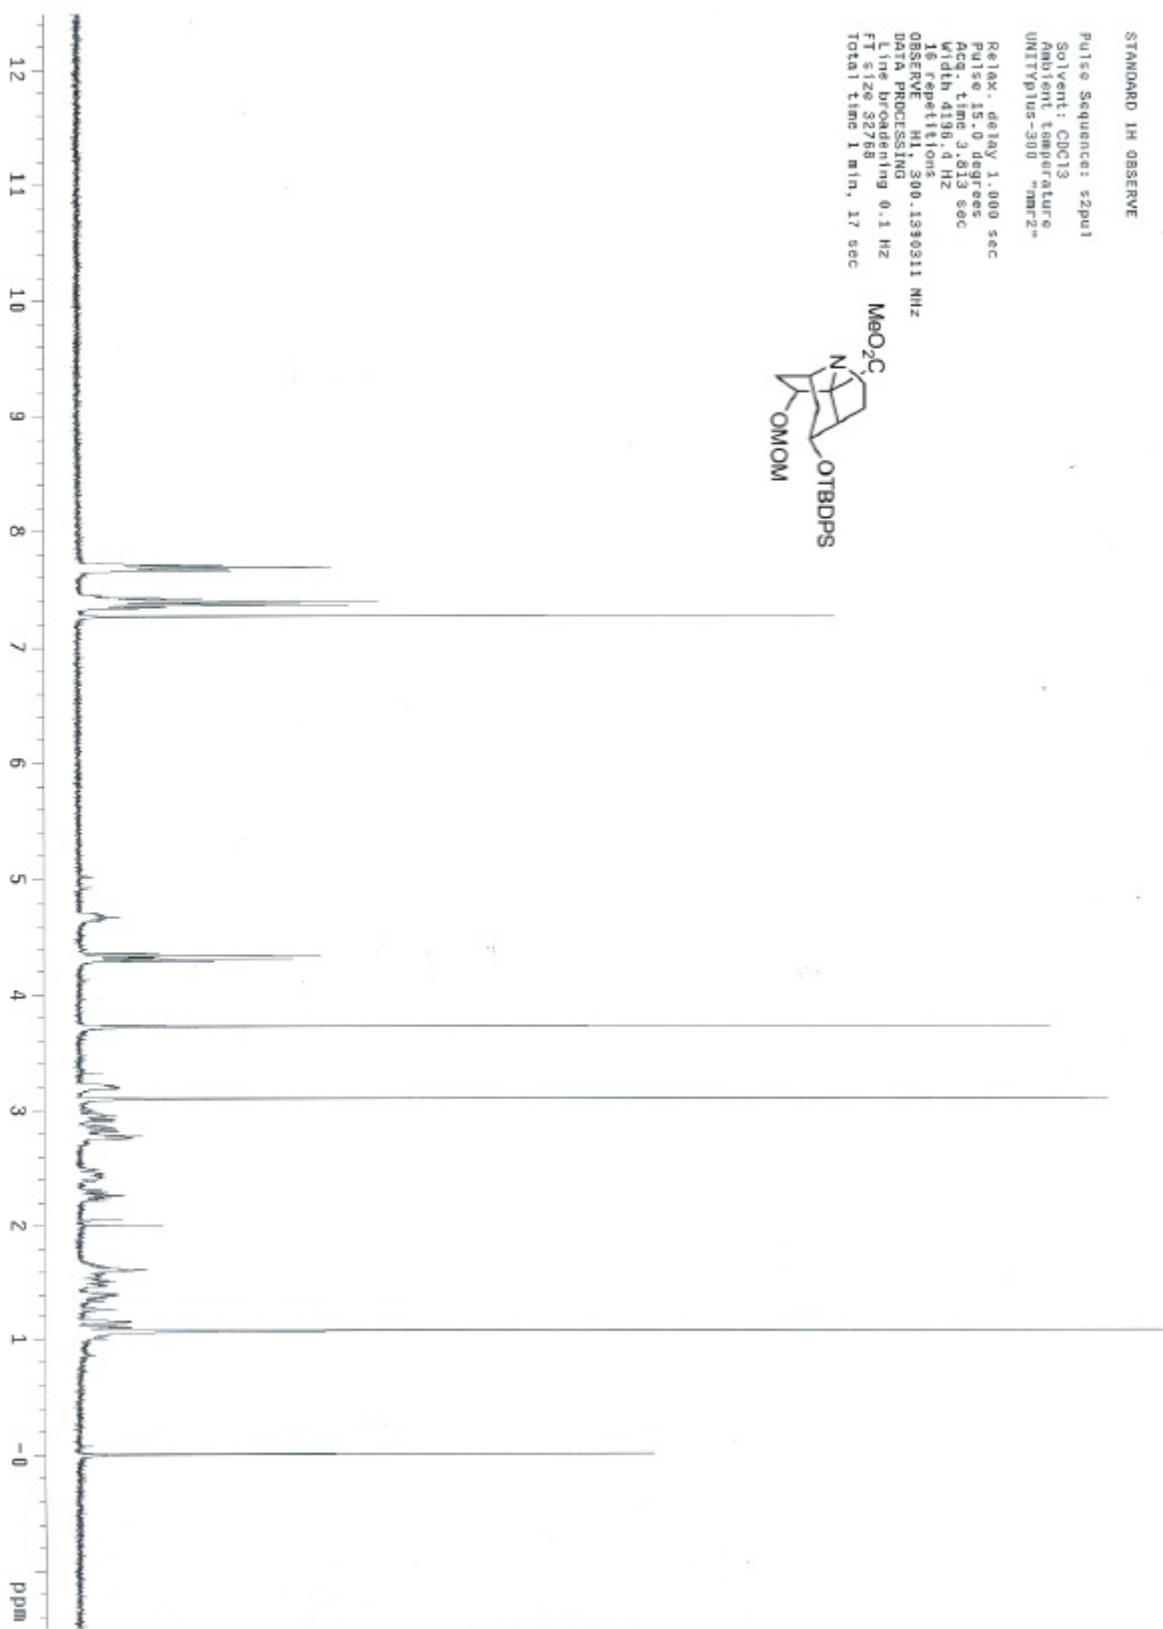

13C OBSERVE

Pulse Sequence: szpu1

Solvent: CDCl3  
ambient temperature  
UNIT: plus-300 -mmr2-

Relax. delay 2.000 sec

Pulse 36.0 degrees

Acq. time 1.777 sec

Width 18009.9 Hz

1024 repetitions

OBSERVE C13, 75.470194 MHz

DECUPLE H1, 300.1408259 MHz

Power 40 dB

continuously on

WALTZ-16 modulated

SINGLE PRECISION data

DATA PROCESSING

Line broadening 1.0 Hz

File size 65336

Total time 1 hr, 4 min, 58 sec

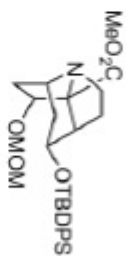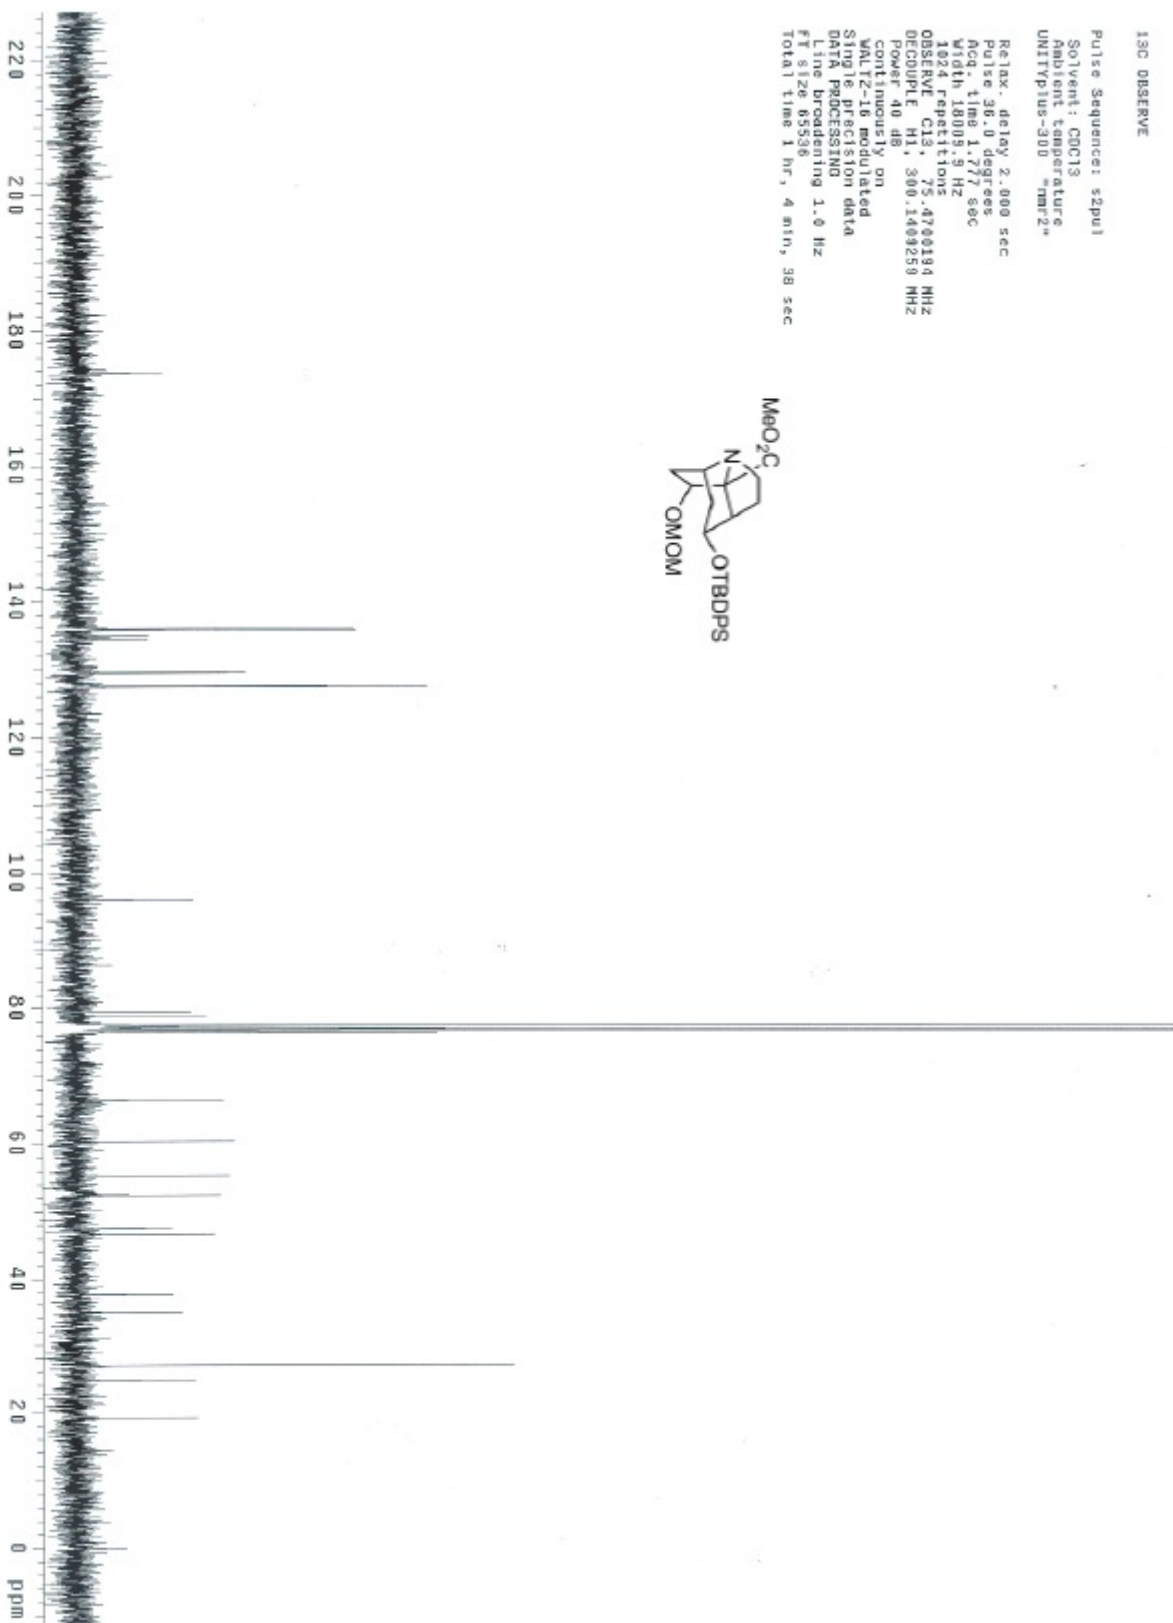

STANDARD 1H OBSERVE

Pulse Sequence: s2pul  
Solvent: CDCl3  
Ambient temperature  
UNITYplus-300 "nmr2"  
Relax. delay: 1.000 sec  
Pulse 15.0 degrees  
Acq. time 3.813 sec  
Width 4195.4 Hz  
16 repetitions  
OBSERVE H1, 300.1390324 MHz  
DATA PROCESSING  
Line broadening 0.1 Hz  
FT size 32758  
Total time 1 min, 17 sec

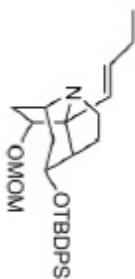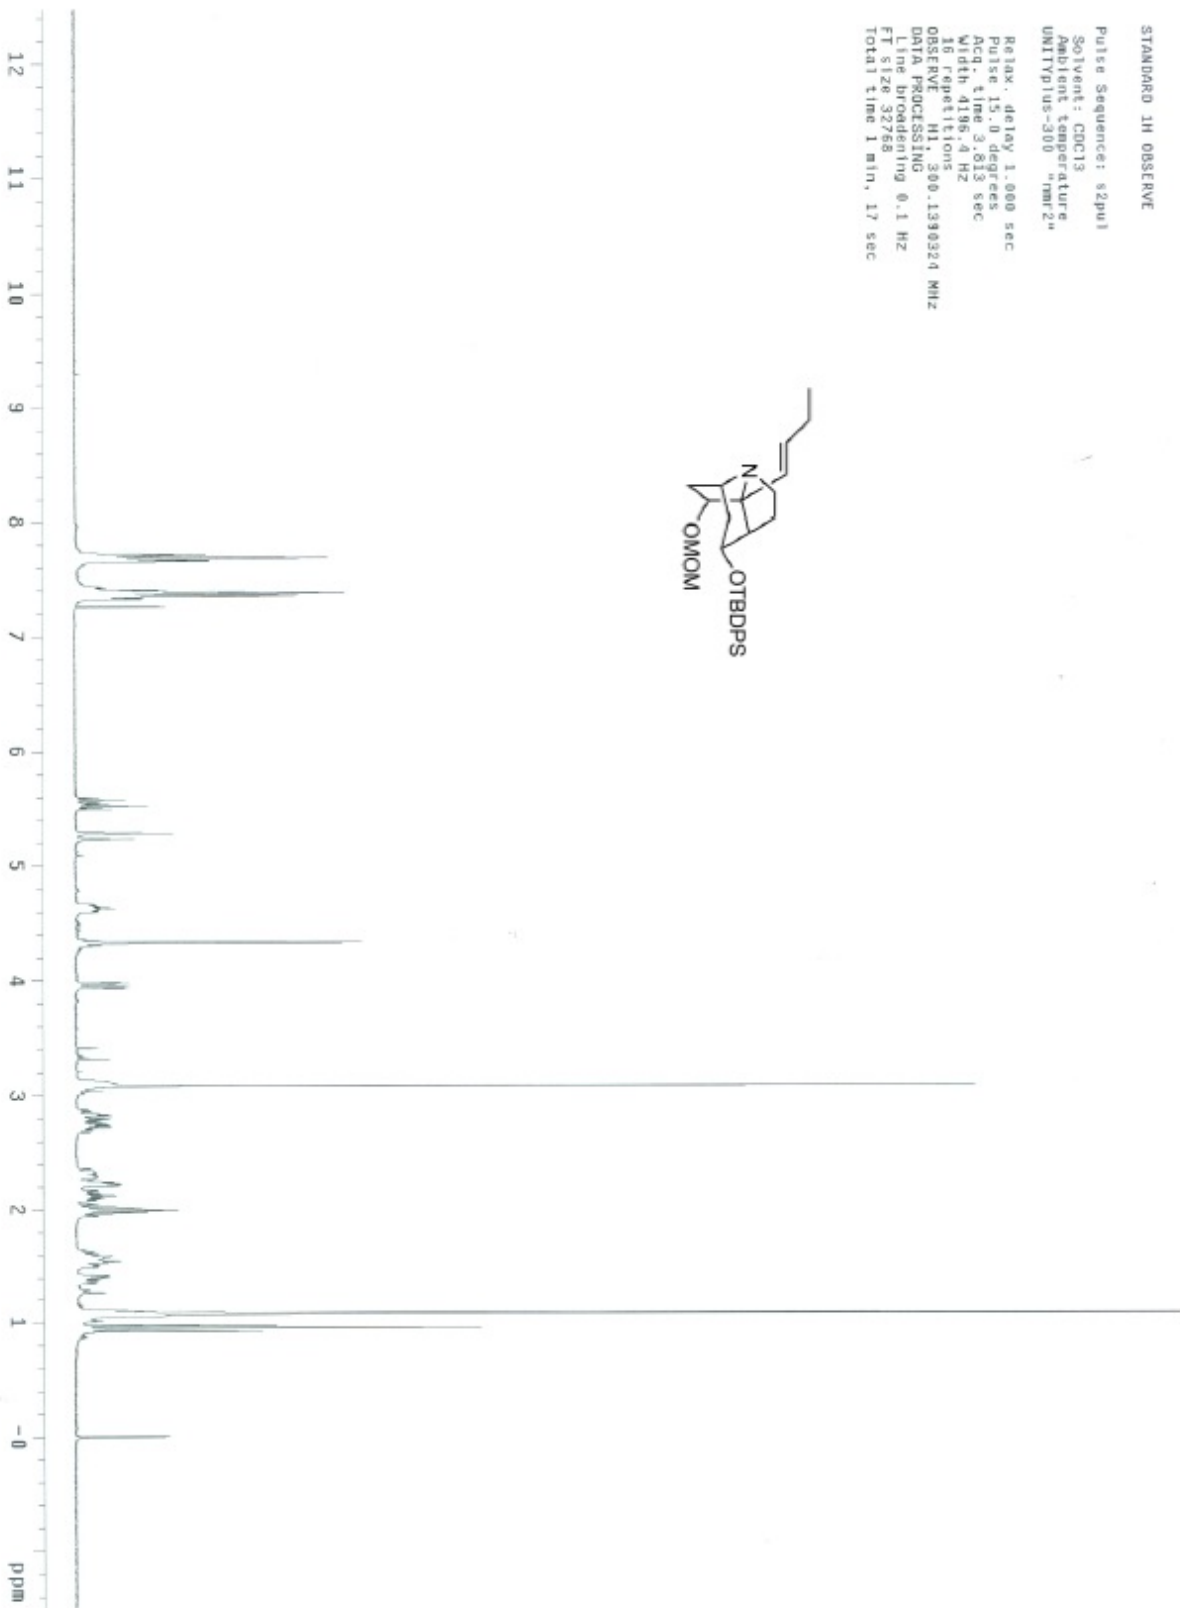



13C OBSERVE

Pulse Sequence: zgpg30  
Solvent: CDCl3  
Ambient temperature  
UNIT: plus-300 °nmr2"

Relax. delay 2.000 sec  
Pulse 30.0 ug/seg  
Acq. time 0.77 sec  
Width 1800.9 Hz  
SFO 520 Repetitions  
OBSERVE C13 75.4700205 MHz  
DECOUPLE H1 300.1409259 MHz  
Power 40.0 dB  
continuously on  
WALTZ-16 modulated  
Single precision data  
DATA PROCESSING  
Line broadening 1.0 Hz  
FT size 65536  
Total time 1 hr, 4 min, 38 sec

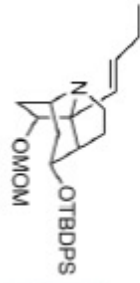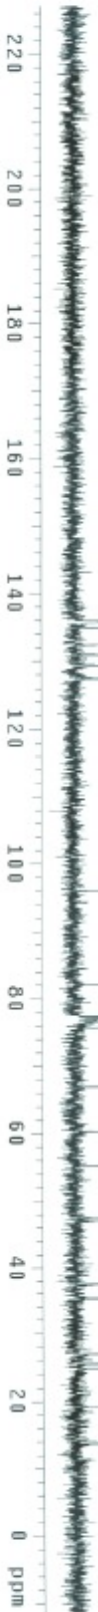

STANDARD 1H OBSERVE

Pulse Sequence: s2pu1  
Solvent: CDCl3  
Nucleic Temperature:  
UNITplus-300 "nmr2"

Relax. delay 1.000 sec  
Pulse 15.0 degrees  
Acq. time 3.813 sec  
Width 4186.4 Hz  
16 repetitions  
OBSERVE H1, 300.1390283 MHz  
DATA PROCESSING  
Line broadening 0.1 Hz  
FT size 32768  
Total time 1 min, 17 sec

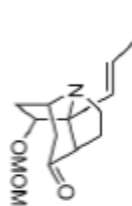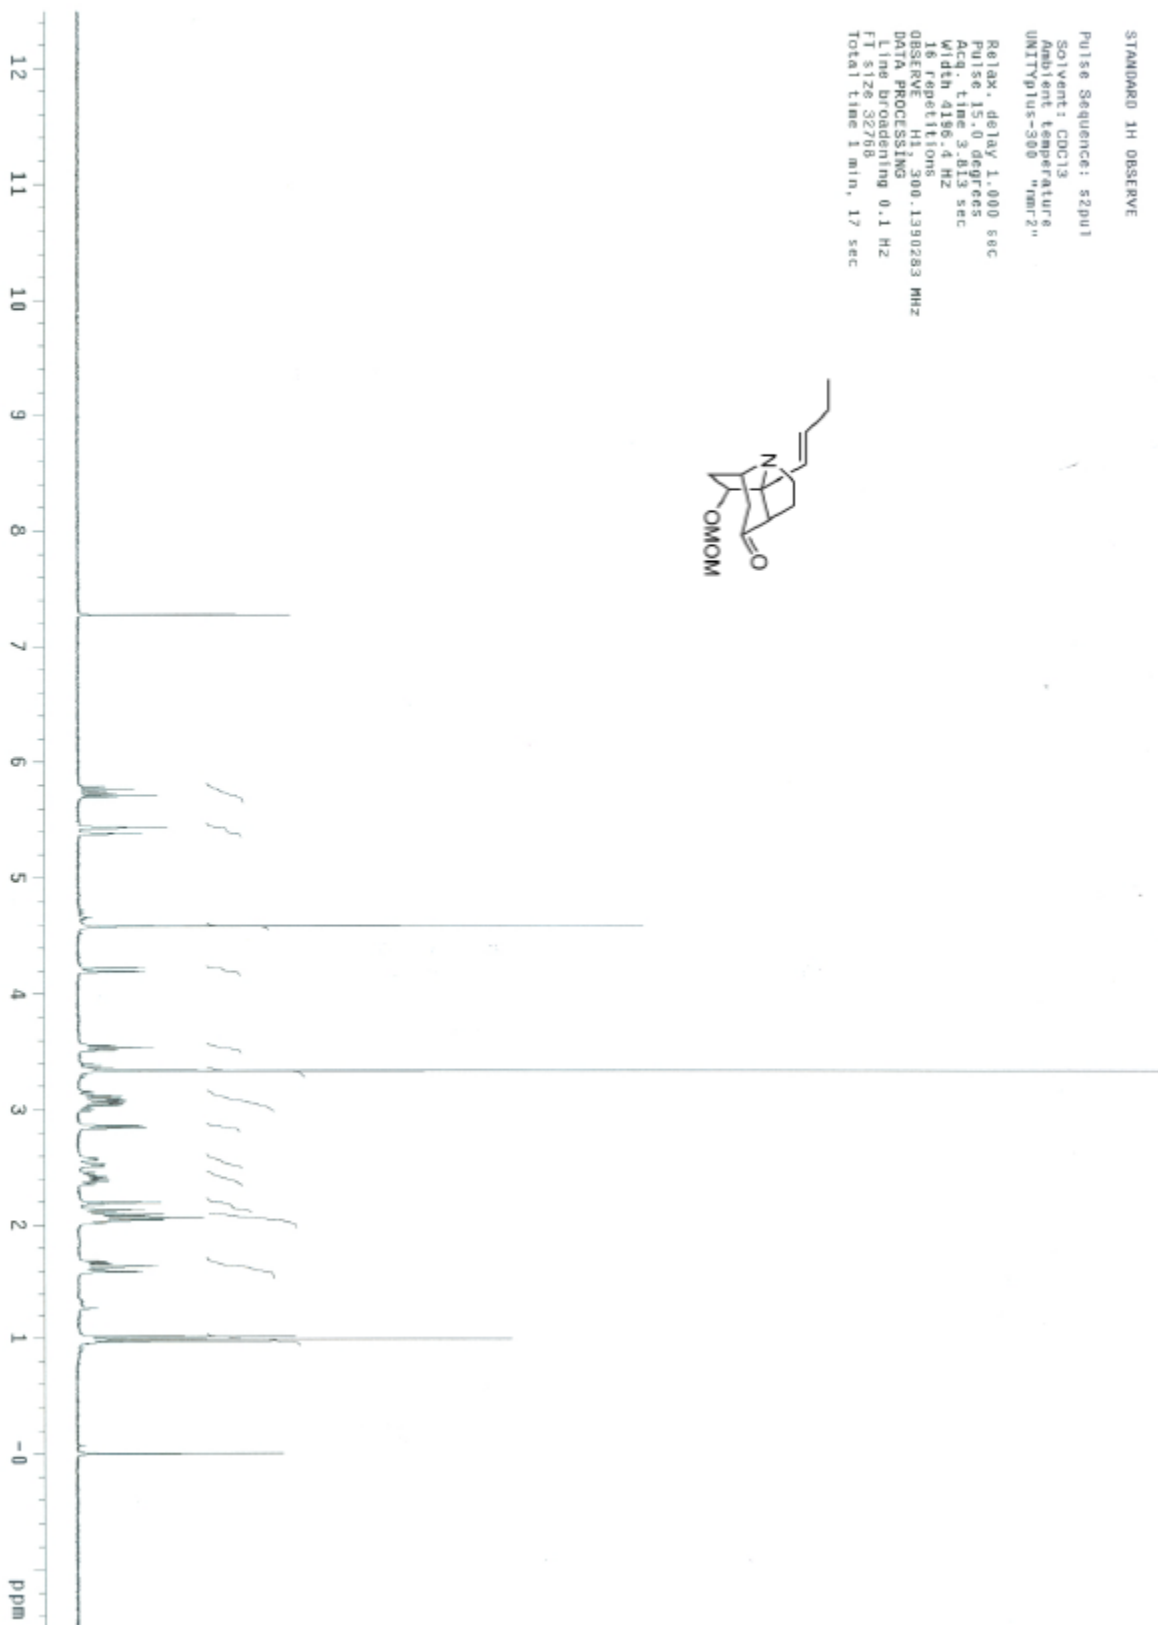

13C OBSERVE

Pulse Sequence: s2pu1  
Solvent: CDCl3  
Ambient temperature:  
UNITYplus-300 "nmr2"

Relax. delay 2.000 sec  
Pulse 36.0 degrees  
Acq. time 1.777 sec  
Width 18009.5 Hz  
835 repetitions  
OBSERVE C13, 75.4700178 MHz  
DECUPLE H1, 300.1409259 MHz  
Power 40 db  
continuously on  
WALTZ-16 modulated  
Single precision data  
DATA PROCESSING  
Line broadening 1.0 Hz  
FT size 65536  
Total time 1 hr, 4 min, 38

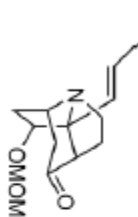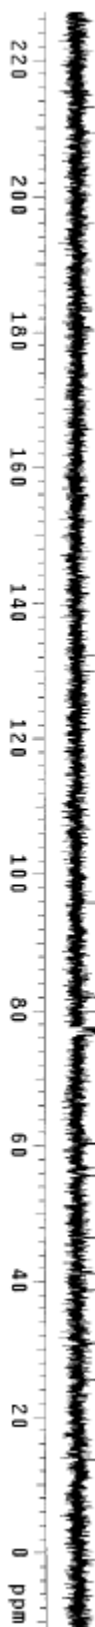

STANDARD IN OBSERVE

Pulse Sequence: s2pu1  
Solvent: CDCl3  
Ambient temperature  
UNITplus-300 "nmr2"

Relax. delay 1.000 sec  
Pulse 15.0 degrees  
Acq. time 3.013 sec  
160H 4196.41 Hz  
150P 4196.41 Hz  
OBSERVE N1 tom 300.1380295 MHz  
DATA PROCESSING  
Line broadening 0.1 Hz  
FT size 32768  
Total time 1 min, 17 sec

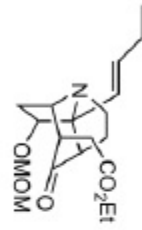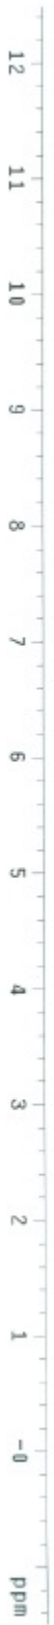

13C OBSERVE

Pulse Sequence: zgpg30

Solvent: CDCl3  
Ambient temperature  
Mercury-40088 "nmr6"

Relax. delay 2.000 sec  
Pulse 22.5 degrees  
Acq. time 1.280 sec  
Width 25188.9 Hz  
3808 repetitions  
OBSERVE C13, 100.6472130 MHz  
DECUPLE H1, 400.2689955 MHz  
Power 38 dB  
continuously on  
WALTZ-16 modulated  
DATA PROCESSING  
Line broadening 1.0 Hz  
F1 size 65536  
Total time 6 hr., 4 min., 45 sec

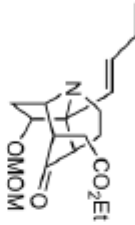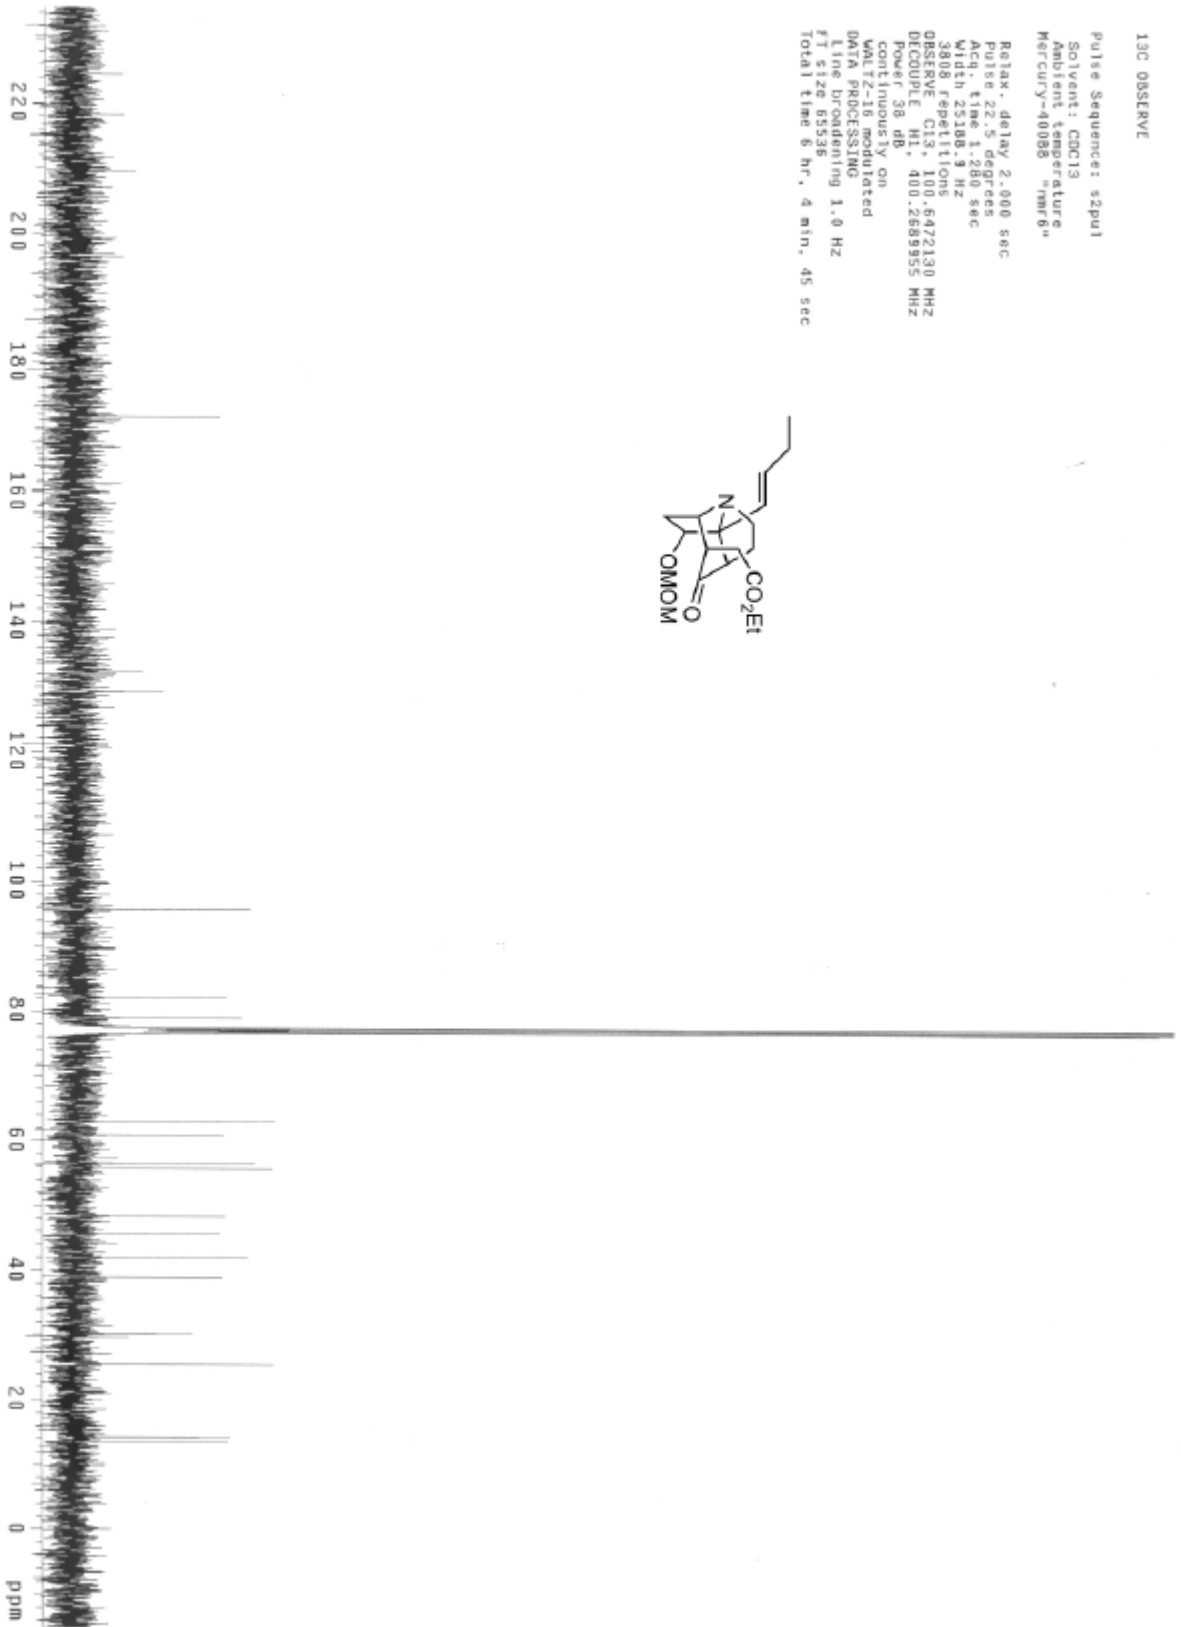

500 MHz mrf 0

CF\_1\_233\_L11

exp1 Proton

| SAMPLE  |             | SPECIAL |          |
|---------|-------------|---------|----------|
| date    | Feb 14 2012 | temp    | 27.0     |
| solvent | cdcl3       | spin    | not used |
| file    | exp         | bst     | 0.000    |
| acq     | 7997.6      | pw90    | 11.000   |
| at      | 4.001       | dtfd    | 6.600    |
| np      | 64000       | flags   | n        |
| fb      | 4000        | in      | n        |
| bs      | 1           | ep      | y        |
| ss      | 2           | hs      | nm       |
| d1      | 2.000       | ps      | nm       |
| nt      | 64          | fn      | 0.10     |
| ct      | 64          | td      | 262144   |
| tr      | TRANSMITTER | H1      | DISPLAY  |
| strq    | 499.808     | sp      | -250.0   |
| tor     | 499.8       | wd      | 5248.5   |
| tpwr    | 57          | ftt     | 594.9    |
| pw      | 1.053       | ftf     | 0        |
| dn      | DECOUPLER   | C13     | TP       |
| dnf     | 0           | tp      | 109.0    |
| dnm     | 0           | plot    | -7.5     |
| dmn     | mmr         | wc      | 250      |
| dms     | c           | sc      | 414      |
| dpr     | 4           | vs      | 414      |
| dprf    | 14285       | tn      | 12       |
| dmt     | dl          | ph      | 12       |

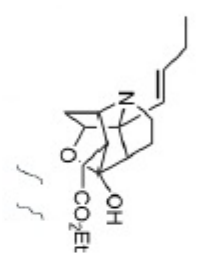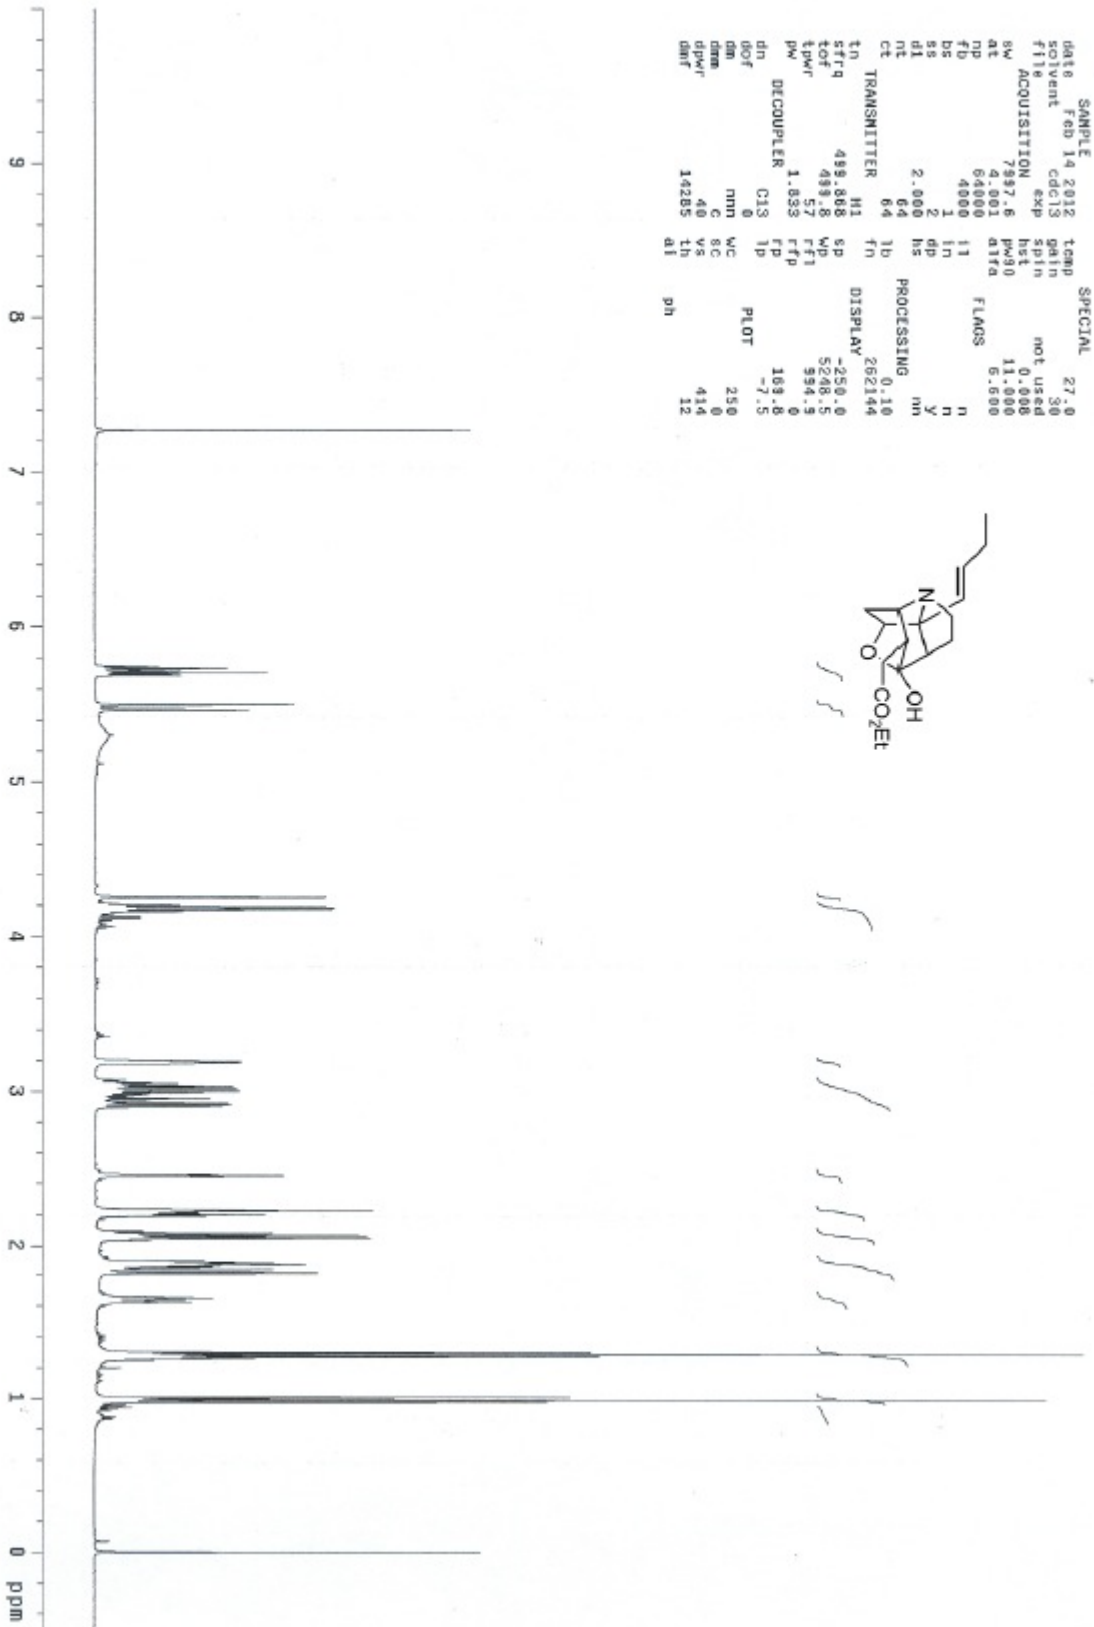

500 MHz nmr0

cf\_1\_233\_c13

expt1 Carbon

SAMPLE  
date Feb-14-2012 temp 27.0  
solvent cdcl3 gain 50  
f110 exp hst not used  
ACQUISITION pw90 9.500  
wv 30165.9 pw90 10.000  
at 1.858 d1fa  
np 18154 11  
fb 17000 11  
ds B sn  
d1 2.000 dp  
nt 15000 hs  
ct 3046  
TRANSMITTER lb  
tn C13 fn  
sfreq 125.704 sp not used  
lor 1255.4 mp DISPLAY -628.8  
epwr 53 f71 28280.1  
pw 3.163 f71 1910.7  
DECOUPLER H1 f7p  
dn 0 1p -109.8  
dof 0 PLDT -210.8  
dm YYY uc 250  
dnn 37 sc  
dprf 10582 vs 10490  
dmf 18  
at1 ph

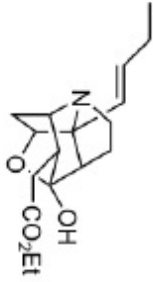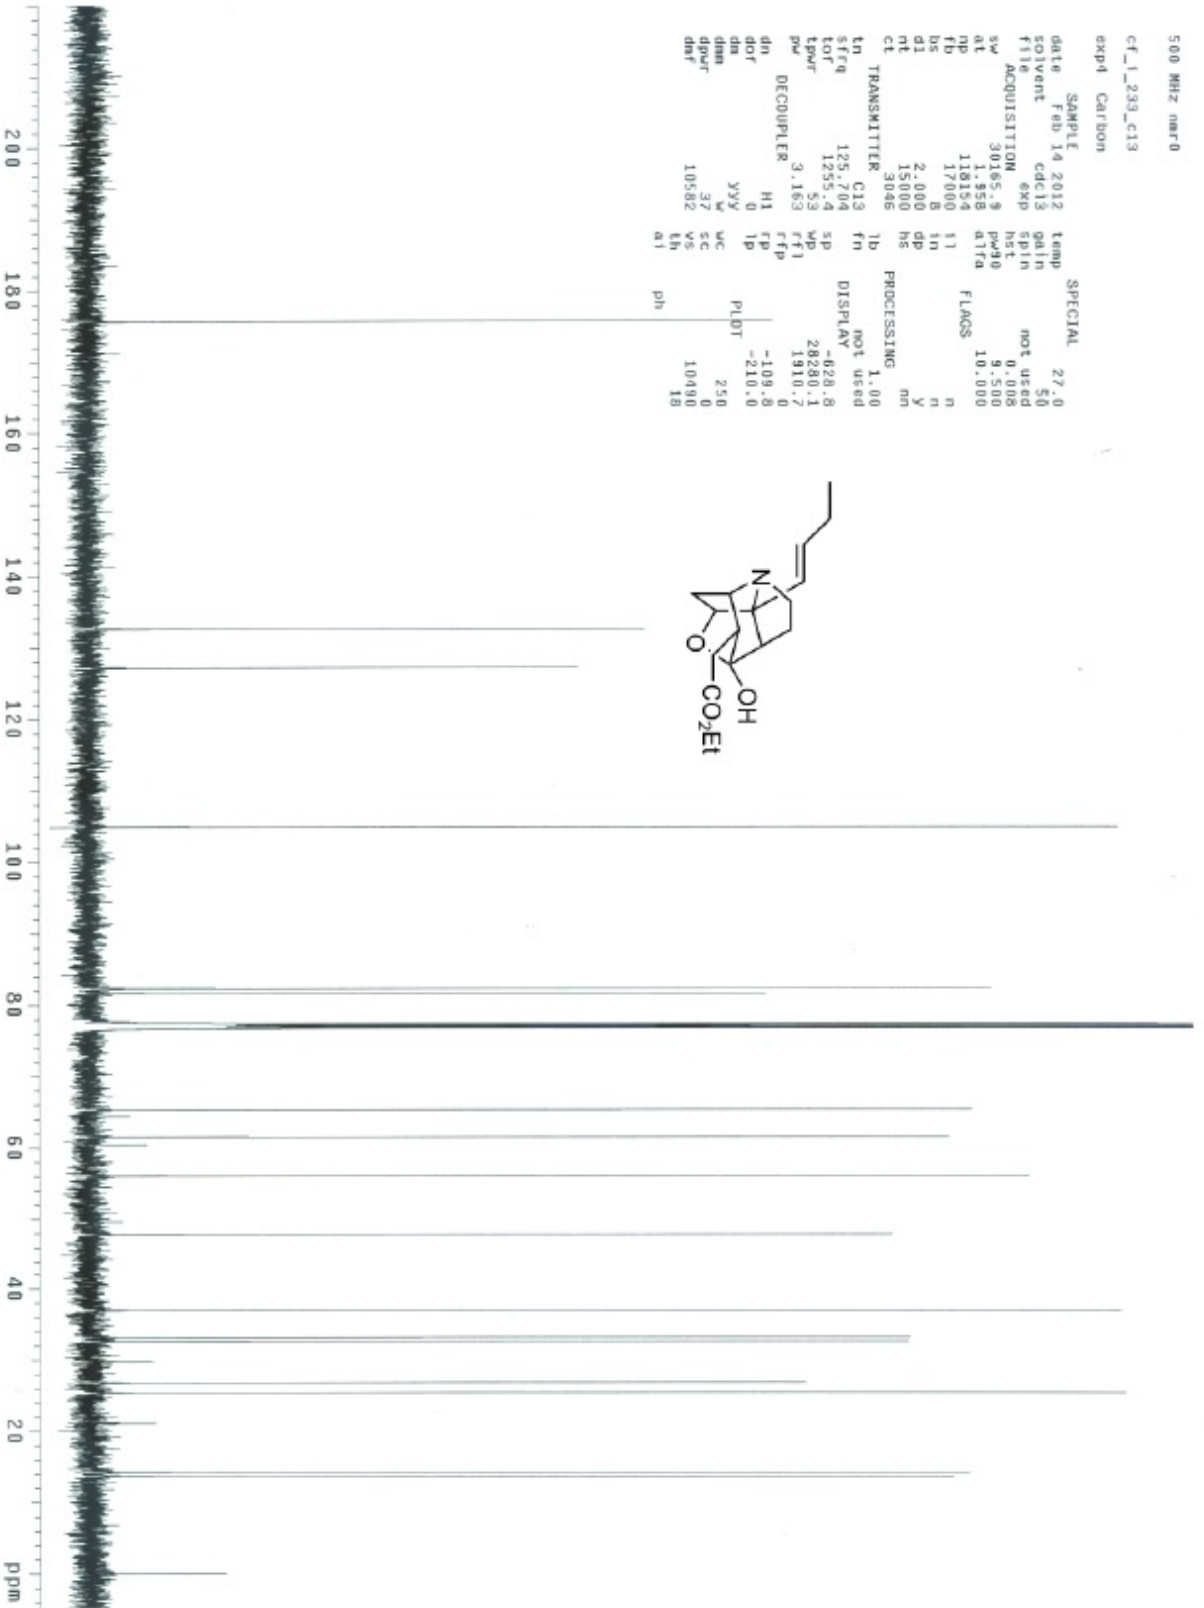

**Reference:**

1. Pangborn, A. B.; Giardello, M. A.; Grubbs, R. H.; Rosen, R. K.; Timmers, F. J. *Organometallics* **1996**, *15*, 1518-1520.
2. Still, W. C.; Kahn, M.; Mitra, A. *J. Org. Chem.* **1978**, *43*, 2923-2925.
3. Brüggemann, M.; McDonald, A. I.; Overman, L. E.; Rosen, M. D.; Schwink, L.; Scott, J. P. *J. Am. Chem. Soc.* **2003**, *125*, 15284-15285.
